# 1 **Fetal-like reversion in the regenerating intestine is regulated by mesenchymal Asporin**

2 **Authors:** Sharif Iqbal<sup>1</sup>, Simon Andersson<sup>1†</sup>, Ernesta Nestaite<sup>1†</sup>, Nalle Pentinmikko<sup>1</sup>, Ashish  
3 Kumar<sup>1</sup>, Daniel Borshagovski<sup>2</sup>, Anna Webb<sup>2</sup>, Tuure Saarinen<sup>3</sup>, Anne Juuti<sup>3</sup>, Alessandro Ori<sup>4</sup>,  
4 Markku Varjosalo<sup>1</sup>, Kirsi H. Pietiläinen<sup>5,6</sup>, Kim B. Jensen<sup>7,8</sup>, Menno Oudhoff<sup>9</sup>, Pekka Katajisto<sup>1,2,10\*</sup>

## 5 6 **Affiliations:**

7 <sup>1</sup>Institute of Biotechnology, HiLIFE, University of Helsinki, Helsinki, Finland

8 <sup>2</sup>Department of Cell and Molecular Biology, Karolinska Institutet, Stockholm, Sweden

9 <sup>3</sup>Helsinki University Hospital, Abdominal Center, Department of Gastrointestinal Surgery,  
10 Helsinki, Finland

11 <sup>4</sup>Leibniz Institute on Aging, Fritz Lipmann Institute, Jena, Germany

12 <sup>5</sup>Obesity Research Unit, Research Programs Unit, Diabetes and Obesity, University of Helsinki,  
13 Helsinki, Finland

14 <sup>6</sup>Helsinki University Hospital, Abdominal Center, Department of Endocrinology, Obesity Center,  
15 Helsinki, Finland

16 <sup>7</sup>BRIC—Biotech Research and Innovation Centre, University of Copenhagen, Copenhagen,  
17 Denmark

18 <sup>8</sup>Novo Nordisk Foundation Center for Stem Cell Biology, DanStem, University of  
19 Copenhagen, Copenhagen, Denmark

20 <sup>9</sup>Centre of Molecular Inflammation Research, Department of Clinical and Molecular Medicine,  
21 NTNU-Norwegian University of Science and Technology, Trondheim, Norway

22 <sup>10</sup>Molecular and Integrative Bioscience Research Programme, Faculty of Biological and  
23 Environmental Sciences, University of Helsinki, Helsinki, Finland.

24 <sup>†</sup>These authors contributed equally

25 <sup>\*</sup>Correspondence to: [pekka.katajisto@helsinki.fi](mailto:pekka.katajisto@helsinki.fi)

27 **ABSTRACT**

28 **Epithelial tissues undergo fetal-like cellular reprogramming to regenerate after damage<sup>1,2</sup>.**  
29 **Although the mesenchyme and the extracellular matrix (ECM) play critical roles in tissue**  
30 **homeostasis and regeneration<sup>2-5</sup>, their role in repurposing developmental programs in**  
31 **epithelium is unknown. To model epithelial regeneration, we culture intestinal epithelium**  
32 **on decellularized small intestinal scaffold (iECM), and identify Asporin (Aspn), an ECM**  
33 **bound proteoglycan, as a critical mediator of cellular reprogramming. Aspn is produced**  
34 **by the mesenchyme, and we show that its effect on epithelial Tgfb $\beta$ -signalling via CD44 is**  
35 **critical for fetal-like conversion. Furthermore, we demonstrate that *Aspn* is transiently**  
36 **increased upon chemotherapy-induced damage and pivotal for a timely induction of the**  
37 **fetal-like state and tissue regeneration. In summary, we establish a platform for modelling**  
38 **epithelial injury responses *ex vivo*, and show that the mesenchymal *Aspn*-producing niche**  
39 **controls tissue repair by regulating epithelial fetal-like reprogramming.**

40  
41 Cellular plasticity is integral for intestinal regeneration as a mechanism for restoring epithelial  
42 integrity following damage such as ulceration and mucositis<sup>2,6</sup>. Intestinal organoids<sup>7</sup> provide a  
43 useful tool to study the intra-epithelial mechanisms of this process<sup>8</sup>, however, organoids are  
44 typically grown in reconstituted matrices that are distinct from the native environment of the  
45 epithelial cells. Moreover, *in vivo* repair involves many extracellular matrix components<sup>2</sup> and  
46 inputs from the mesenchyme<sup>9-11</sup>. Hydrogel matrices that support organoid culture lack the native  
47 ECM composition and factors produced by the stroma<sup>12</sup> and do not allow studies probing on their  
48 function during regeneration. We reasoned that tissue decellularization, which removes live cells  
49 while retaining matrix bound growth factors and the acellular ECM architecture intact, may provide  
50 an attractive complement to the organoid system as a native scaffold that includes many of the  
51 cues guiding regeneration *in vivo*. Unlike the synthetic scaffolds<sup>13</sup>, decellularized intestine

52 contains the organization of the basement membrane and auxiliary ECM factors, and akin to  
53 tissue regeneration following damage provide a surface substrate for tissue remodelling  
54 independent of dynamic cellular inputs from the stromal compartment.

55

56 In order to develop a model that allows quantification of the epithelial reparative growth and the  
57 impact of extra-epithelial mechanisms, we developed a functional assay using decellularized  
58 small intestinal matrixes (iECM). We expanded on published decellularization protocols<sup>12</sup> to allow  
59 efficient growth and expansion of epithelial cells *ex vivo* (**Extended Data Fig. 1a**).  
60 Decellularization preserved the 3D tissue architecture with distinct regions of former villi and  
61 crypts (**Fig.1a, Extended Data Fig. 1b**). When we re-introduced epithelium onto the iECMs by  
62 seeding either freshly isolated mouse small intestinal crypts or organoids<sup>7</sup>, the seeded epithelial  
63 cells grew from small islands to form a monolayer covering both the empty crypt pits and denuded  
64 villi with striking similarity to the organization and topology of the live tissue (**Fig.1a-c, Extended**  
65 **Data Fig. 1b**). As in the native tissues, Keratin 20, a marker of villous differentiation<sup>14</sup> was  
66 restricted to the epithelium covering villi (**Fig.1b**), and proliferating cells marked by EdU  
67 incorporation were confined to the re-epithelialized crypts (**Ext. Data Fig. 1c**). Furthermore, when  
68 cells from the *Lgr5-EGFP-IRES-CreERT2* reporter mouse was used for the re-epithelialization of  
69 the iECMs *Lgr5*<sup>+</sup> cells, and *Lyz*<sup>+</sup> Paneth cells were restricted at the crypt bottom, as in the native  
70 epithelium (**Fig. 1b & Ext. Data Fig. 1d**). Furthermore, the fully re-epithelialized iECMs reached  
71 a steady state, where stem and progenitor cells proliferate in steady crypts, – and differentiating  
72 cells move to villi. This allowed prolonged culture (>3 weeks), as the dead cells shedding from  
73 villus can be removed from the open layout iECMs by media change. This is in contrast with  
74 intestinal organoids, where differentiated epithelial cells exfoliate into the organoid lumen, and it  
75 is therefore necessary to passage crypt domains of mechanically disrupted organoids to ensure  
76 continuous propagation. Demonstrating self-renewal capacity, crypts isolated from the re-

77 epithelialized iECM formed organoids in Matrigel similarly to crypts isolated directly from the  
78 mouse intestine (**Ext. Data Fig. 1e**). Jointly, these findings reveal that signals associated with  
79 the 3D architecture of the tissue including extracellular matrix components guide cell fate, and  
80 that stem cells self-renew on the iECM allowing analysis of re-epithelization of exposed ECM *ex*  
81 *vivo*.

82

83 Even though the growth rate of epithelial cells on iECM was comparable to organoids in Matrigel  
84 (**Fig. 1d**), the process of iECM re-epithelialization was distinct from the growth of organoids.  
85 Whereas new crypts in organoids appear by self-organization of the epithelium<sup>7</sup>, the epithelial  
86 monolayer growing on iECM formed crypts only into the predetermined empty crypt pits of the  
87 former tissue. As the epithelial growth on iECM was guided by its intact ECM, we asked whether  
88 re-epithelialization of the empty iECM *ex vivo* recapitulates aspects of *in vivo* re-epithelialization  
89 following damage. Epithelial cells participating in tissue regeneration transition into a fetal-like  
90 state expressing markers including *Sca1*<sup>2</sup> and *Clu*<sup>15</sup>. Interestingly, epithelial cells seeded on iECM  
91 displayed a profound upregulation of both markers (**Fig. 1f; Ext. Data Fig. 2b**), suggesting that  
92 the seeding on iECM recapitulates the epithelial response during tissue regeneration.

93

94 Damage-induced developmental reversion in the epithelium can be triggered Yap/Taz  
95 dependently by exposure to ECM constituents<sup>2</sup>, and by interferon gamma in response to parasitic  
96 infection<sup>1</sup>. Tgf $\beta$  signalling is another pathway critical for epithelial homeostasis<sup>16</sup> and  
97 regeneration<sup>11,17,18</sup>, and has been linked to developmental reversion in cancer cells<sup>19</sup>. In order to  
98 probe the importance of Tgf $\beta$  signalling in re-epithelialization of the iECM and in the conversion from  
99 a homeostatic to a regenerative phenotype, we used the Tgf $\beta$  Type I receptor (Tgf $\beta$ RI) kinase  
100 inhibitor A8301<sup>20</sup>. In Matrigel embedded organoids A8301 increased the crypt formation



101 significantly, whereas on iECM A8301 reduced the re-epithelization and *de novo* crypt formation  
102 (**Fig.1e**). As A8301 induced opposite effects in epithelium cultured in Matrigel and on iECM, we  
103 next assayed the Tgf $\beta$  signalling activity on the two culture systems. Expression of target genes  
104 of Tgf $\beta$ -signalling was increased when dissociated crypt domains from Matrigel grown organoids  
105 were placed on the iECM (**Ext. Data Fig. 2a**). Importantly, the significant burst of fetal-state  
106 markers *Sca1* and *Clu* on iECM was completely dependent on Tgf $\beta$  signalling (**Fig.1f; Ext. Data**  
107 **Fig. 2b**). Moreover, the transient induction of the Sca1+ fetal-like cells was restricted to the  
108 periphery of the expanding epithelium (**Fig.1g-h**). Jointly these data suggest that a Tgf $\beta$  induced  
109 fetal program is integral to the re-epithelization of the decellularized iECM scaffolds.

110

111 To identify which Tgf $\beta$  pathway modulating factors are retained in the iECM, and could contribute  
112 to the Tgf $\beta$  dependent engagement of the epithelial fetal-like program, we examined the proteomic  
113 composition of iECMs by mass spectrometry. Indicating that the decellularization process  
114 effectively removes majority of the intracellular proteins, 15 of the 20 most abundant proteins were  
115 associated with the ECM (matrisome database<sup>21</sup>) (**Table-1**). Among these, we identified Decorin  
116 and Asporin, two Tgf $\beta$  pathway modulating short leucine rich repeat proteoglycans (SLRPs)<sup>22</sup>,  
117 and another Tgf $\beta$  pathway modulating SLRP, Biglycan, was also detected with lower abundance.  
118 Neither recombinant Decorin (1  $\mu$ g/ml) or Biglycan (1  $\mu$ g/ml) induced Tgf $\beta$  -signaling and fetal-like  
119 markers when tested on intestinal organoids (**Ext. Data Fig. 3**). In contrast, purified recombinant  
120 asporin (*Aspn*) (**Ext. Data Fig. 4a**) strongly stimulated expression of Tgf $\beta$ -responsive genes in  
121 intestinal organoids (**Fig. 2a, b**). *In situ* hybridization analysis of intact tissues revealed that *Aspn*  
122 is detected in pericryptal mesenchymal cells (**Fig. 2c**), which have been shown to support  
123 epithelial functions in homeostasis and tumorigenesis by secreting factors modulating Tgf $\beta$ , Bmp,  
124 Yap and Wnt signalling in the epithelium<sup>3,4,23</sup>. Consistently, by re-analysing the publicly available

125 data, we observed high level of *Aspn* expression in *Pdgfra*<sup>low</sup> population which reside around the  
126 crypt base<sup>4</sup> (**Ext. Data Fig. 4b**).

127

128 Extracellular *Aspn* is reported to bind Tgf $\beta$  ligands and thereby inhibit downstream Tgf $\beta$   
129 signalling<sup>24</sup>. However, we noted that r*Aspn* promoted Tgf $\beta$  signalling. Therefore, we investigated  
130 other possible mechanisms modulating the *Aspn*-Tgf $\beta$  signalling axis. *Aspn* binds the CD44  
131 transmembrane hyaluronan receptor<sup>25,26</sup>, which is highly expressed by the intestinal stem cells  
132 and progenitors<sup>27</sup> and increased in the fetal-like regenerative population<sup>1</sup>. Via CD44, *Aspn* can  
133 activate epithelial mesenchymal transition (EMT) and NF- $\kappa$ B pathways<sup>26</sup>, but interestingly, CD44  
134 can also physically interact with Tgf $\beta$  receptor I and activate Tgf $\beta$ /Smad signalling Tgf $\beta$ -ligand  
135 independently<sup>28</sup>. Consistently, we observed that r*Aspn* treatment of the intestinal organoids led to  
136 significant changes in genes responsive to CD44-downstream pathways including Tgf $\beta$  (**Fig 2b**),  
137 EMT, Stat3 and NF- $\kappa$ B<sup>28,29</sup> (**Ext. Data Fig. 5a-c**). r*Aspn* treatment also modestly increased the  
138 Yap/Taz pathway regulated genes (**Ext. Data Fig 6**). These findings suggested that *Aspn*  
139 promotes Tgf $\beta$  signalling in the intestine via the CD44 transmembrane receptor. In support, CD44  
140 function blocking antibody<sup>30</sup> blunted the effects of r*Aspn* on Tgf $\beta$  signalling (**Fig. 2d**).

141

142 Since *Aspn* was abundant in the iECM, and r*Aspn* induced Tgf $\beta$  signalling, we next asked whether  
143 the *Aspn*-induced Tgf $\beta$  signalling underlies the epithelial fetal-like reversion that we observed on  
144 the iECM during tissue reepithelization. We first tested whether r*Aspn* can induce the fetal-state  
145 in the intestinal organoids in Matrigel. Excitingly, r*Aspn* reverted a significant portion of the  
146 intestinal organoids into Sca1+ spheroids similar to what has been observed from fetal intestinal  
147 epithelium (**Fig. 3a**). Moreover, the transcriptional changes induced by r*Aspn* overlapped  
148 strikingly with the previously reported transcriptional profile of fetal intestinal organoids<sup>31</sup> (**Fig. 3b**).

149 We tested if the fetal-like spheroidal growth induced by *Aspn* can promote the formation new  
150 crypts in organoids. After withdrawal of r*Aspn*, fetal-like spheroids were resolved into budding  
151 organoids, and transient pulse of r*Aspn* increased crypts formation in organoids in a dose-  
152 dependent manner (**Ext. Data Fig. 7**). Furthermore, compared to the IgG2b  $\kappa$  treated control  
153 organoids, the effect of r*Aspn* on crypt formation in organoid was blunted by the CD44 blocking  
154 antibody (**Fig. 3c**). Transient r*Aspn* also increased the organoid forming capacity of human small  
155 intestinal crypts, demonstrating that effects of *Aspn* on intestinal epithelium are conserved (**Fig.**  
156 **3d**). However, while CD44-blocking antibody reduced the transcriptional effects of r*Aspn* on fetal  
157 markers significantly (**Fig 3e; Ext. Data Fig. 8a**), only A8301 fully blocked the effects of *Aspn*  
158 (**Fig. 3f; Ext. Data Fig. 8b-d**). This suggested that CD44 blockade with an antibody is not  
159 complete, and may initiate the positive feedback-loop activating the Tgf $\beta$ -pathway via *Tgf $\beta$ 1*  
160 expression<sup>32</sup>. We therefore tested whether Tgf $\beta$ 1 can directly induce fetal-like state in organoids.  
161 Recombinant Tgf $\beta$ 1 (0.1 ng/ml) induced fetal-like spheroid formation in organoids similarly to  
162 *Aspn* (**Ext. Data Fig. 9a-c**), increased crypt formation in organoids when administered transiently  
163 (48h), but decreased it upon sustained treatment (**Ext. Data Fig. 9d**). Taken together, *Aspn*  
164 induces fetal-like regenerative state in the epithelium via CD44 and the Tgf $\beta$ -pathway, and its  
165 effects can be recapitulated by Tgf $\beta$ -ligand mediated pathway activation.

166

167 Cross-talk between mesenchyme and epithelium is necessary for *in vivo* homeostasis<sup>3,4,33</sup> and  
168 tissue repair<sup>9-11</sup>. To study the role of mesenchymal *Aspn* in epithelial regeneration on iECM *ex*  
169 *vivo*, and *in vivo*, we generated a mouse model harbouring a conditional allele of *Aspn* (*Aspn*<sup>lox</sup>)  
170 (**Ext. Data Fig. 10a**), and crossed it with *Twist2-Cre* mice<sup>34</sup> to delete *Aspn* in the mesenchyme  
171 (*Twist2-Cre; Aspn*<sup>lox/lox</sup>, hereafter *Aspn*<sup>SKO</sup>) (**Ext. Data Fig. 10a-f**). *Aspn*<sup>SKO</sup> mice are fertile and  
172 develop normally, allowing us to generate comparable iECMs from *Aspn*<sup>WT</sup> and *Aspn*<sup>SKO</sup> mice. In  
173 comparison to *Aspn*<sup>WT</sup> iECM, wild type epithelium grew significantly slower on *Aspn*<sup>SKO</sup> iECM (**Fig.**

174 **3g**). However, epithelial regeneration on the *Aspn*<sup>SKO</sup> iECM was rescued with transient exogenous  
175 rAspn treatment in the start of the culture (**Fig. 3g**). These data demonstrate that stromally  
176 deposited Aspn supports regeneration on iECM.

177

178 We further probed the role of Aspn during tissue repair *in vivo* by administering mice with 5-  
179 Fluorouracil (5-FU). In mice, acute 5-FU treatment induces cell death in crypts leading to loss of  
180 body weight due to reduced water retention and nutrient intake<sup>35</sup>, and provides a tractable system  
181 for assessing intestinal injury, repair, and recovery<sup>36</sup>. We observed that *Aspn* expression is  
182 transiently increased after 5-FU (200 mg/kg) (**Fig. 4a**), but subsides during the later stages of  
183 intestinal regeneration (day 5 post 5FU). Furthermore, when treated with 5-FU, the *Aspn*<sup>SKO</sup> mice  
184 did not recover like WT animals (**Fig. 4b**). Importantly, the initial weight loss was similar to *Aspn*<sup>WT</sup>  
185 mice, suggesting that *Aspn*<sup>SKO</sup> mice experience similar damage as *Aspn*<sup>WT</sup> mice, but that tissue  
186 repair and regeneration is impaired. Consistent with the notion of poor regeneration, cellular  
187 density of the villi (**Fig. 4c**), and villus/crypt -length ratio (**Ext. Data Fig. 11**) were reduced in  
188 *Aspn*<sup>SKO</sup> at five days after 5-FU.

189

190 To further address why *Aspn*<sup>SKO</sup> mice recover poorly, we assessed proliferation in the 5-FU  
191 damaged epithelium. Whereas in *Aspn*<sup>WT</sup> mice proliferation peaks at day 3 post injection and  
192 recedes back to normal level at day 5 post injection (**Ext. Data Fig. 12**), *Aspn*<sup>SKO</sup> mice contrasted  
193 this pattern with dramatic reduction in proliferation at 3 days (**Fig. 4d**) and increased proliferation  
194 at five days after 5FU (**Fig. 4e**). Jointly these data suggest that loss of stromal *Aspn* retards the  
195 engagement of the regenerative program in the epithelium.

196

197 Finally, we sought to investigate Tgf $\beta$  pathway activity and cell state reversion in *Aspn*<sup>WT</sup> and  
198 *Aspn*<sup>SKO</sup> mice during 5-FU induced regeneration. In line with normal development and intestinal  
199 histology of the unchallenged *Aspn*<sup>SKO</sup> mice, pSmad2 levels in the crypt epithelium of the vehicle  
200 treated *Aspn*<sup>SKO</sup> and *Aspn*<sup>WT</sup> mice were similar (**Ext. Data Fig. 13**). However, crypts in *Aspn*<sup>WT</sup>  
201 mice had significantly higher peak pSmad2 levels upon damage (day 3 post 5-FU) that subsided  
202 to normal levels upon recovery (day 5 post 5-FU) (**Ext. Data Fig. 13**). The reduced initial induction  
203 of Tgf $\beta$  signalling in *Aspn*<sup>SKO</sup> mice also resulted in longer maintenance of damage-induced Tgf $\beta$   
204 activity, supporting the notion of late onset of proliferation (**Fig. 4d-e**) and delayed tissue repair.  
205 These data confirm that injury-induced mesenchymal *Aspn* can promote rapid activation of  
206 epithelial Tgf $\beta$  signalling *in vivo*, and the *Aspn*-mediated temporally controlled boost to Tgf $\beta$   
207 induction is necessary for proper epithelial regeneration. Importantly, frequency of Sca1<sup>+</sup> cells  
208 was dramatically reduced in *Aspn*<sup>SKO</sup> mice three days after 5-FU (**Fig. 4f; Ext. Data Fig. 14**),  
209 suggesting that defects in the CD44-Tgf $\beta$ RI mediated induction of the fetal-like regenerative state  
210 delays epithelial regeneration after deletion of mesenchymal *Aspn*.

211  
212 The culture platform we describe here allows *ex vivo* recapitulation of early epithelial injury  
213 responses and overcomes many shortcomings of closed-format organoids. Using this platform,  
214 we discovered a novel mesenchymally produced intestinal niche factor Asporin, which upon tissue  
215 damage induces a transient fetal-like change in the epithelial cell state and thereby coordinates  
216 tissue repair. Taken together, this study highlights the dynamic nature and importance of cross-  
217 talk between mesenchymal and epithelial cells during regeneration, and suggests that the *Aspn*-  
218 CD44-Tgf $\beta$  signalling axis has evolved to allow temporal control over tissues repair programs.  
219 The *Aspn*-mediated regulation of epithelial cell-state may also provide new opportunities to target  
220 epithelial tumor initiation<sup>23</sup> and ulcerative colitis<sup>2</sup>, where drift of developmental programs is  
221 implicated.

222

223

## REFERENCES

- 224 1 Nusse, Y. M. *et al.* Parasitic helminths induce fetal-like reversion in the intestinal stem  
225 cell niche. *Nature* **559**, 109-113, doi:10.1038/s41586-018-0257-1 (2018).
- 226 2 Yui, S. *et al.* YAP/TAZ-Dependent Reprogramming of Colonic Epithelium Links ECM  
227 Remodeling to Tissue Regeneration. *Cell Stem Cell* **22**, 35-49 e37,  
228 doi:10.1016/j.stem.2017.11.001 (2018).
- 229 3 Shoshkes-Carmel, M. *et al.* Subepithelial telocytes are an important source of Wnts that  
230 supports intestinal crypts. *Nature* **557**, 242-246, doi:10.1038/s41586-018-0084-4 (2018).
- 231 4 McCarthy, N. *et al.* Distinct Mesenchymal Cell Populations Generate the Essential  
232 Intestinal BMP Signaling Gradient. *Cell Stem Cell* **26**, 391-402 e395,  
233 doi:10.1016/j.stem.2020.01.008 (2020).
- 234 5 Degirmenci, B., Valenta, T., Dimitrieva, S., Hausmann, G. & Basler, K. GLI1-expressing  
235 mesenchymal cells form the essential Wnt-secreting niche for colon stem cells. *Nature*  
236 **558**, 449-453, doi:10.1038/s41586-018-0190-3 (2018).
- 237 6 Chang, C. T. *et al.* 5-Fluorouracil induced intestinal mucositis via nuclear factor-kappaB  
238 activation by transcriptomic analysis and in vivo bioluminescence imaging. *PLoS One* **7**,  
239 e31808, doi:10.1371/journal.pone.0031808 (2012).
- 240 7 Sato, T. *et al.* Single Lgr5 stem cells build crypt-villus structures in vitro without a  
241 mesenchymal niche. *Nature* **459**, 262-265, doi:10.1038/nature07935 (2009).
- 242 8 Clevers, H. Modeling Development and Disease with Organoids. *Cell* **165**, 1586-1597,  
243 doi:10.1016/j.cell.2016.05.082 (2016).
- 244 9 Jarde, T. *et al.* Mesenchymal Niche-Derived Neuregulin-1 Drives Intestinal Stem Cell  
245 Proliferation and Regeneration of Damaged Epithelium. *Cell Stem Cell* **27**, 646-662 e647,  
246 doi:10.1016/j.stem.2020.06.021 (2020).
- 247 10 Miyoshi, H. *et al.* Prostaglandin E2 promotes intestinal repair through an adaptive  
248 cellular response of the epithelium. *EMBO J* **36**, 5-24, doi:10.15252/embj.201694660  
249 (2017).
- 250 11 Miyoshi, H., Ajima, R., Luo, C. T., Yamaguchi, T. P. & Stappenbeck, T. S. Wnt5a  
251 Potentiates TGF-beta Signaling to Promote Colonic Crypt Regeneration After Tissue  
252 Injury. *Science* **338**, 108-113, doi:10.1126/science.1223821 (2012).
- 253 12 Chen, H. J. *et al.* A recellularized human colon model identifies cancer driver genes. *Nat*  
254 *Biotechnol* **34**, 845-851, doi:10.1038/nbt.3586 (2016).
- 255 13 Nikolaev, M. *et al.* Homeostatic mini-intestines through scaffold-guided organoid  
256 morphogenesis. *Nature* **585**, 574-578, doi:10.1038/s41586-020-2724-8 (2020).
- 257 14 Calnek, D. & Quaroni, A. Differential localization by in situ hybridization of distinct  
258 keratin mRNA species during intestinal epithelial cell development and differentiation.  
259 *Differentiation* **53**, 95-104, doi:10.1111/j.1432-0436.1993.tb00649.x (1993).
- 260 15 Ayyaz, A. *et al.* Single-cell transcriptomes of the regenerating intestine reveal a revival  
261 stem cell. *Nature* **569**, 121-125, doi:10.1038/s41586-019-1154-y (2019).
- 262 16 Oshimori, N. & Fuchs, E. The harmonies played by TGF-beta in stem cell biology. *Cell*  
263 *Stem Cell* **11**, 751-764, doi:10.1016/j.stem.2012.11.001 (2012).



- 264 17 Beck, P. L. *et al.* Transforming growth factor-beta mediates intestinal healing and  
265 susceptibility to injury in vitro and in vivo through epithelial cells. *Am J Pathol* **162**, 597-  
266 608, doi:10.1016/s0002-9440(10)63853-9 (2003).
- 267 18 Hahm, K. B. *et al.* Loss of transforming growth factor beta signalling in the intestine  
268 contributes to tissue injury in inflammatory bowel disease. *Gut* **49**, 190-198,  
269 doi:10.1136/gut.49.2.190 (2001).
- 270 19 Han, T. *et al.* Lineage Reversion Drives WNT Independence in Intestinal Cancer. *Cancer*  
271 *Discov* **10**, 1590-1609, doi:10.1158/2159-8290.CD-19-1536 (2020).
- 272 20 Ogunjimi, A. A. *et al.* Structural basis for specificity of TGFbeta family receptor small  
273 molecule inhibitors. *Cell Signal* **24**, 476-483, doi:10.1016/j.cellsig.2011.09.027 (2012).
- 274 21 Hynes, R. O. & Naba, A. Overview of the matrisome--an inventory of extracellular  
275 matrix constituents and functions. *Cold Spring Harb Perspect Biol* **4**, a004903,  
276 doi:10.1101/cshperspect.a004903 (2012).
- 277 22 Merline, R., Schaefer, R. M. & Schaefer, L. The matricellular functions of small leucine-  
278 rich proteoglycans (SLRPs). *J Cell Commun Signal* **3**, 323-335, doi:10.1007/s12079-009-  
279 0066-2 (2009).
- 280 23 Roulis, M. *et al.* Paracrine orchestration of intestinal tumorigenesis by a mesenchymal  
281 niche. *Nature* **580**, 524-529, doi:10.1038/s41586-020-2166-3 (2020).
- 282 24 Maris, P. *et al.* Asporin Is a Fibroblast-Derived TGF-beta1 Inhibitor and a Tumor  
283 Suppressor Associated with Good Prognosis in Breast Cancer. *PLoS Med* **12**, e1001871,  
284 doi:10.1371/journal.pmed.1001871 (2015).
- 285 25 Satoyoshi, R., Kuriyama, S., Aiba, N., Yashiro, M. & Tanaka, M. Asporin activates  
286 coordinated invasion of scirrhous gastric cancer and cancer-associated fibroblasts.  
287 *Oncogene* **34**, 650-660, doi:10.1038/onc.2013.584 (2015).
- 288 26 Wang, L. *et al.* Asporin promotes pancreatic cancer cell invasion and migration by  
289 regulating the epithelial-to-mesenchymal transition (EMT) through both autocrine and  
290 paracrine mechanisms. *Cancer Lett* **398**, 24-36, doi:10.1016/j.canlet.2017.04.001 (2017).
- 291 27 Gracz, A. D. *et al.* Brief report: CD24 and CD44 mark human intestinal epithelial cell  
292 populations with characteristics of active and facultative stem cells. *Stem Cells* **31**, 2024-  
293 2030, doi:10.1002/stem.1391 (2013).
- 294 28 Bourguignon, L. Y., Singleton, P. A., Zhu, H. & Zhou, B. Hyaluronan promotes signaling  
295 interaction between CD44 and the transforming growth factor beta receptor I in  
296 metastatic breast tumor cells. *J Biol Chem* **277**, 39703-39712,  
297 doi:10.1074/jbc.M204320200 (2002).
- 298 29 Xu, H. *et al.* The role of CD44 in epithelial-mesenchymal transition and cancer  
299 development. *Onco Targets Ther* **8**, 3783-3792, doi:10.2147/OTT.S95470 (2015).
- 300 30 Mikecz, K., Brennan, F. R., Kim, J. H. & Glant, T. T. Anti-CD44 treatment abrogates  
301 tissue oedema and leukocyte infiltration in murine arthritis. *Nat Med* **1**, 558-563,  
302 doi:10.1038/nm0695-558 (1995).
- 303 31 Mustata, R. C. *et al.* Identification of Lgr5-independent spheroid-generating progenitors  
304 of the mouse fetal intestinal epithelium. *Cell Rep* **5**, 421-432,  
305 doi:10.1016/j.celrep.2013.09.005 (2013).
- 306 32 Heldin, C. H. & Moustakas, A. Signaling Receptors for TGF-beta Family Members. *Cold*  
307 *Spring Harb Perspect Biol* **8**, doi:10.1101/cshperspect.a022053 (2016).
- 308 33 Bahar Halpern, K. *et al.* Lgr5+ telocytes are a signaling source at the intestinal villus tip.  
309 *Nat Commun* **11**, 1936, doi:10.1038/s41467-020-15714-x (2020).

- 310 34 Sasic, D., Richardson, J. A., Yu, K., Ornitz, D. M. & Olson, E. N. Twist regulates  
311 cytokine gene expression through a negative feedback loop that represses NF-kappaB  
312 activity. *Cell* **112**, 169-180, doi:10.1016/s0092-8674(03)00002-3 (2003).
- 313 35 Song, M. K., Park, M. Y. & Sung, M. K. 5-Fluorouracil-induced changes of intestinal  
314 integrity biomarkers in BALB/c mice. *J Cancer Prev* **18**, 322-329,  
315 doi:10.15430/jcp.2013.18.4.322 (2013).
- 316 36 Pentinmikko, N. *et al.* Notum produced by Paneth cells attenuates regeneration of aged  
317 intestinal epithelium. *Nature* **571**, 398-402, doi:10.1038/s41586-019-1383-0 (2019).
- 318 37 Yilmaz, O. H. *et al.* mTORC1 in the Paneth cell niche couples intestinal stem-cell  
319 function to calorie intake. *Nature* **486**, 490-495, doi:10.1038/nature11163 (2012).
- 320 38 Sato, T. *et al.* Long-term expansion of epithelial organoids from human colon, adenoma,  
321 adenocarcinoma, and Barrett's epithelium. *Gastroenterology* **141**, 1762-1772,  
322 doi:10.1053/j.gastro.2011.07.050 (2011).
- 323 39 Dobin, A. *et al.* STAR: ultrafast universal RNA-seq aligner. *Bioinformatics* **29**, 15-21,  
324 doi:10.1093/bioinformatics/bts635 (2013).
- 325 40 Hartley, S. W. & Mullikin, J. C. QoRTs: a comprehensive toolset for quality control and  
326 data processing of RNA-Seq experiments. *BMC Bioinformatics* **16**, 224,  
327 doi:10.1186/s12859-015-0670-5 (2015).
- 328 41 Love, M. I., Huber, W. & Anders, S. Moderated estimation of fold change and dispersion  
329 for RNA-seq data with DESeq2. *Genome Biol* **15**, 550, doi:10.1186/s13059-014-0550-8  
330 (2014).
- 331 42 Ritchie, M. E. *et al.* limma powers differential expression analyses for RNA-sequencing  
332 and microarray studies. *Nucleic Acids Res* **43**, e47, doi:10.1093/nar/gkv007 (2015).
- 333 43 Liberzon, A. *et al.* Molecular signatures database (MSigDB) 3.0. *Bioinformatics* **27**,  
334 1739-1740, doi:10.1093/bioinformatics/btr260 (2011).
- 335 44 Ohman, T., Tamene, F., Goos, H., Loukovaara, S. & Varjosalo, M. Systems pathology  
336 analysis identifies neurodegenerative nature of age-related vitreoretinal interface  
337 diseases. *Aging Cell* **17**, e12809, doi:10.1111/accel.12809 (2018).
- 338 45 Barker, N. *et al.* Identification of stem cells in small intestine and colon by marker gene  
339 *Lgr5*. *Nature* **449**, 1003-1007, doi:10.1038/nature06196 (2007).
- 340

## 341 METHODS

### 342 Isolation of mouse intestinal crypts

343 Mouse small intestinal crypts were isolated as previously published<sup>37</sup>. Briefly, mouse small  
344 intestine was flushed with the cold PBS, mucus and mesentery were removed, and subsequently,  
345 cut opened. Intestine was cut into smaller pieces and incubated with 10 mM EDTA in PBS (3x)  
346 on ice for 2 hr. Epithelium was detached by vigorous shaking, and filtered through 70  $\mu$ m nylon  
347 mesh. Enriched crypts were washed with cold PBS once more, and plated in 60% Matrigel (BD  
348 Biosciences) with ENR media. 10  $\mu$ M Y-27632 was added to the media for the first 2 days.



349

### 350 **Isolation of human crypts**

351 Human small intestinal biopsies were cut into small pieces on ice cold PBS. Biopsies are then  
352 incubated with 10 mM EDTA in PBS (with 3x changes) on ice for 2 hr. Crypts were isolated by  
353 vigorously shaking, and filtered through 70  $\mu$ m nylon mesh. Isolated crypts were washed with ice  
354 cold PBS and cultured in 60% Matrigel (BD Biosciences) as described previously<sup>38</sup>.

355

### 356 **Organoid culture**

357 200-300 crypts were plated per 20 $\mu$ l drop of 60% Matrigel and overlaid with ENR media  
358 (DMEM/F12 (Gibco), 1x Glutamax (Gibco), 100 U/ml of Penicillin and Streptomycin, 10 mM  
359 HEPES, 50 ng/ml of mouse EGF (RnD), 100 ng/ml noggin (Peprotech), 500 ng/ml of RSpondin-1  
360 (RnD), 1  $\mu$ M N-Acetyl-L-cysteine (Sigma-Aldrich). 10  $\mu$ M Y-27632 was added for the first two days  
361 of culture. Primary organoids were cultured for 5-6 days, after which regenerative growth (number  
362 of *de novo* crypt domains per organoid) was quantified and organoids sub-cultured. Quantification  
363 was done blindly, whenever possible. Sub-culturing was performed by mechanically disrupting  
364 organoids to single crypt fragments, which were re-plated (1:4) to fresh matrigel. Secondary  
365 cultures were confirmed to start from single crypt domain by inspection, and their survival and *de*  
366 *novo* crypt number was quantified 2 days after re-plating. When indicated ENR media was  
367 supplemented with recombinant Aspn (rAspn) or equal amount of vehicle (PBS with 0.1% BSA)  
368 was used in controls. ENR supplemented with 10 nM Gastrin (Sigma-Aldrich), Wnt3A (RnD), 1  
369 mM Nicotinamide (Sigma-Aldrich), and 10  $\mu$ M SB202190 (Sigma-Aldrich) was used for isolated  
370 human small intestinal crypts<sup>38</sup>. Human small intestinal organoid starting frequency was counted  
371 at day 4. When indicated, ENR media was supplemented with 0.1 ng/ml rTgf $\beta$ 1, 500 ng/ml rAspn  
372 and 1  $\mu$ g/ml of ultra-LEAF<sup>TM</sup> CD44 function blocking antibody (Clone IM7; Biolegend) or equal  
373 amount of isotype control IgG2b kappa (Clone RTK4533; Biolegend).

374

### 375 **Decellularization**

376 iECM was prepared by decellularizing ileum part of the mouse intestine. Briefly, intestine was  
377 flushed through with ice cold MQ water. Mucus and mesentery were removed, and incubated with  
378 MQ water overnight at +4°C. Following the incubation, intestine was flushed through with MQ  
379 water. Then, the intestine was cut into smaller pieces (~1 cm) and incubated with 1% Sodium  
380 Deoxycholate (SDC) for 3 hr at room temperature (RT) on a shaker. Pieces of the intestine were  
381 washed with MQ water for 15 min at RT on a shaker. Intestinal pieces are further incubated with  
382 1 M Sodium Chloride (NaCl) and DNaseI (1 U/10 µl) for 2 hr at RT on a shaker. Finally, pieces of  
383 iECM were washed with PBS for 15 min at RT on a shaker before storing at +4°C (short-term) or  
384 at -80°C (long-term).

385

### 386 **Crypt culture on iECM**

387 Tubular iECM was cut into open, and placed on glass bottom dish as luminal side facing upward.  
388 iECM was primed with 30 µl standard ENR for 1 hr at the standard cell culture incubator. Before  
389 plating on iECM, cultured organoids were carefully washed (3x) with cold advanced DMEM/F12.  
390 iECM was overlaid with 15-30 small round organoids (2-3 days culture) or single crypt domain  
391 (broken from passaged organoids). Standard ENR media was overlaid intermittently on iECM to  
392 avoid drying at the cell culture incubator. After 1 hr of incubation, ENR media was overlaid to the  
393 final volume of 350 µl. After overnight culture, the number of adhered organoids were counted  
394 and iECM was led to be floated off to glass using a fine tweezer. ENR media was changed every  
395 other day and crypts were counted at day 6-7 post plating for regeneration assay. When indicated,  
396 ENR media was supplemented with 500 ng/ml rAspn and 1 µg/ml of ultra-LEAF<sup>TM</sup> CD44 function  
397 blocking antibody (Clone IM7; Biolegend) or equal amount of isotype control IgG2b kappa (Clone  
398 RTK4533; Biolegend). In case of CD44 function blocking antibody or control IgG2b kappa, crypts

399 were pre-incubated with 1  $\mu$ g/ml CD44 function blocking antibody or equal amount of isotype  
400 control IgG2b kappa before plating into Matrigel, and ENR media was supplemented with 1  $\mu$ g/ml  
401 of ultra-LEAF<sup>TM</sup> CD44 function blocking antibody or equal amount of isotype control IgG2b kappa  
402 in every 12 hours at the indicated duration.

403

#### 404 **Single cell sorting**

405 In order to isolate single cells, freshly isolated crypts were dissociated in TrypLE Express (Gibco)  
406 with 1000 U/ml of DNaseI (Roche) at +32°C for 90 seconds. Cells were washed and stained with  
407 antibodies anti-CD31-PE (Biolegend, Mec13.3), anti-CD45-PE (eBioscience, 30-F11), anti-  
408 Ter119-PE (Biolegend, Ter119), anti-EpCAM-APC (eBioscience, G8.8) and anti-CD24-Pacific  
409 Blue (Biolegend, M1/69). Cells were resuspended with SMEM media (Sigma). 10  $\mu$ M 7-AAD (Life)  
410 was added to the cell suspension for live gating. Cells were sorted by using FACS Aria II (BD  
411 Biosciences). Intestinal stem cells were isolated as Lgr5-EGFP<sup>hi</sup>; Epcam<sup>+</sup>; CD24<sup>lo/-</sup>; CD31<sup>-</sup>;  
412 Ter119<sup>-</sup>; CD45<sup>-</sup>; 7-AAD<sup>-</sup>. Lgr5<sup>hi</sup> cells were cultured with standard ENR media supplemented with  
413 additional 500  $\mu$ g/ml of Rspodin-1 (to yield final concentration of 1 $\mu$ g/ml) and 100 ng/ml Wnt3A  
414 for the first 6 days. 10  $\mu$ M Y-27632 was added to the media for first 2 days. Single cell starting  
415 frequency and clonogenic growth of primary organoids were analysed at day 6-7. For flow  
416 cytometric analysis of Sca1<sup>+</sup> cells, small intestinal epithelial cells were stained with antibodies  
417 anti-CD31-PerCP.Cy5.5 (Biolegend, Mec13.3), anti-CD45- PerCP.Cy5.5, (eBioscience, 30-F11),  
418 anti-EpCAM-BV786 (BDBiosciences, G8.8) and anti-CD24-Pacific Blue (Biolegend, M1/69), anti-  
419 Sca1-PE (Biolegend, D7), and 10  $\mu$ M 7-AAD (Life). Sca1<sup>+</sup> cells were isolated and analysed from  
420 the vehicle/5-FU treated young intestines (2-4 months old; 200 mg/Kg body weight) as Sca1<sup>+</sup>;  
421 Epcam<sup>+</sup>; CD31<sup>-</sup>; CD45<sup>-</sup>;7-AAD<sup>-</sup>.

422

#### 423 **Real-time qPCR**

424 RNA from crypts and cultured organoids was isolated by Trizol purification according to  
425 manufacturer's instructions (Life). RNA from whole tissues was isolated first by homogenizing a  
426 piece of tissue in 1 ml Trizol with Precellys 24 tissue homogenizer. Isolated RNA was digested  
427 with DNaseI enzyme (ThermoFisher Scientific) and transcribed with cDNA synthesis kit using  
428 OligodT primers (Molecular probes). qPCR amplification was detected by SYBRGreen  
429 (2xSYBRGreen mix, Applied biosciences) method. Samples were run as triplicates and genes of  
430 interest were normalized to *Actin/18srRNA/Rpl13a*. Primers used for qPCR-

|     |                  |                           |
|-----|------------------|---------------------------|
| 431 | <i>Actin</i>     | CCTCTATGCCAACACAGTGC      |
| 432 |                  | CCTGCTTGCTGATCCACATC      |
| 433 | <i>Aspn</i>      | CAACGGGATAGAACCAGGGG      |
| 434 |                  | TGTTTCCAAGACCCAGCCTT      |
| 435 | <i>Rpl13a</i>    | GTGGTCCCTGCTGCTCTCAAG     |
| 436 |                  | CGATAGTGCATCTTGGCCTTTT    |
| 437 | <i>Ly6a/Sca1</i> | GAGGCAGCAGTTATTGTGGAT     |
| 438 |                  | CGTTGACCTTAGTACCCAGGA     |
| 439 | <i>Clusterin</i> | AGCAGGAGGTCTCTGACAATG     |
| 440 |                  | GGCTTCCTCTAAACTGTTGAGC    |
| 441 | <i>Msln</i>      | CTTGGGTGGATACCACGTCTG     |
| 442 |                  | CTTCTGTCTTACAGCCATAGCC    |
| 443 | <i>Il1rn</i>     | GCTCATTGCTGGGTACTIONTACAA |
| 444 |                  | CCAGACTTGGCACAAGACAGG     |
| 445 | <i>Tgfβ1</i>     | TGTCCAAACTAAGGCTCGCC      |
| 446 |                  | ACCTCTTTAGCATAGTAGTCCGC   |
| 447 | <i>Pai1</i>      | GGTCTTCTCTCCCTATGGCG      |
| 448 |                  | CTCATTCTTGTTCCACGGCC      |

449

450 **RNA sequencing and data processing**

451 Total RNA was isolated by using RNeasy Mini Kit (Qiagen) according to the Manufacturer's  
452 instructions. On-Column DNase (Qiagen) digestion was performed. For RNAseq from intestinal  
453 organoids, an Ovation Universal RNA-Seq System kit was used for Illumina library preparations  
454 (NuGEN Technologies Inc., CA, USA). Purified total RNA (8.5-100 ng) was used and primers for  
455 ribosomal removal were designed and used as outlined in the kit manual. Libraries were purified  
456 with AMPure XP beads (Beckman Coulter Inc., MA, USA), quantified and run on a NextSeq 500  
457 sequencer using 75b single read kits (Illumina, CA, USA). The read quality was examined with  
458 Fastqc 0.11.8 (<https://www.bioinformatics.babraham.ac.uk/projects/fastqc/>). The reads were  
459 mapped with STAR 2.5.3a<sup>39</sup> to the Gencode version M16 primary genome assembly with  
460 corresponding annotation. The genome fasta and gtf files were downloaded from  
461 [www.gencodegenes.org](http://www.gencodegenes.org). Post-mapping quality control and gene quantification was performed  
462 with QoRTs 1.3.0<sup>40</sup>. R 3.6.2 (<https://www.r-project.org/>) was used for downstream analysis.  
463 Differential expression analysis was performed with DESeq2 1.24.0<sup>41</sup>, gene set enrichment  
464 analysis with camera from the package limma 3.40.2<sup>42</sup>. A rank-based test of enrichment was  
465 performed with camera using voom-transformed normalized counts. Hallmark and C2 gene sets  
466 from MSigDB<sup>43</sup> were collected with the R package msigdb 7.0.1 ([https://cran.r-](https://cran.r-project.org/web/packages/msigdb/index.html)  
467 [project.org/web/packages/msigdb/index.html](https://cran.r-project.org/web/packages/msigdb/index.html)).

468

469 **Immunoblotting**

470 Whole tissue samples were homogenized in RIPA buffer with 1xHalt Protease inhibitor  
471 (ThermoFisher Scientific) and 1xPhosStop (Roche) phosphatase inhibitors by using Precellys  
472 tissue homogenizer. Protein concentrations of cleared lysates were measured by DC Protein  
473 Assay kit (Bio-Rad). Samples were run on 4-12% Bis-Tris protein gels (Life) and blotted on  
474 nitrocellulose membranes. Membranes were incubated with primary antibodies: Aspn (1/1000;  
475 Sigma, SAB2500127), pSmad3 (Ser423/425) (1/1500; CST, C25A9), Smad3 (1/1500; CST,

476 C67H9), Beta-Actin (1/5000; CST, 4967), Alpha-Tubulin (1/3000; CST, 2144) at +4°C followed  
477 by incubating with HRP conjugated anti-rabbit (Sigma-Aldrich) or anti-mouse (CST) or anti-goat  
478 (Dako) for 1 hr RT. Signal was detected using ECL reagent (ThermoFisher Scientific).

479

#### 480 **Immunofluorescence**

481 Tissues were fixed in 4% PFA, processed (Leica ASP200), paraffin embedded, and sectioned.  
482 Antigen retrieval was performed boiling in pH6 Citrate buffer (Sigma-Aldrich) for 20 min.  
483 Antibodies: E-cadherin (1/500; BD, 610181), pSmad2 (1/500; Abcam, ab188334), Sca1 (1/500;  
484 Biologend, D7), CD44 (1/500; ThermoFisher, IM7). Antigen retrieval was followed by  
485 permeabilization with 0.5% Triton-X100 (Sigma). EdU incorporation was followed by EdU Click-  
486 IT chemistry according to manufacturer's instructions (ThermoFisher Scientific). Following fixation  
487 (4% PFA), iECM was incubated with blocking buffer (5% Goat serum, 0.2% BSA, and 0.3% Triton  
488 X-100 in PBS) for 30min RT, and washed twice with PBS. Primary pan-laminin antibody (1/300;  
489 Abcam, ab11575) was diluted with blocking buffer, and incubated at +4°C overnight on a shaker  
490 at 10rpm. iECM was washed 3 times with PBS and incubated with secondary antibody for 1h at  
491 RT. After washing with PBS, samples were imaged using a spinning disc confocal. Primary  
492 antibodies were detected with biotin-conjugated secondary antibodies. For immunofluorescence  
493 Alexa-488, Alexa-594, Alexa-633 and Alexa-647 conjugated anti-rabbit or anti-mouse secondary  
494 (Life) were used. Nuclei were co-stained with DAPI (Life) or Hoechst 33342 (Life).

495

#### 496 **Quantification of nuclear pSmad2 and EdU+ and villus cellular density**

497 ImageJ was used for quantifying nuclear pSmad2 signal intensity. Blinded investigators measured  
498 pSmad2 mean fluorescent intensity from nuclear ROIs of cells from the nucleus of CBC and  
499 Paneth cells (identified by nuclear morphology and cellular shape) of the crypts (>20  
500 crypts/mouse). Background subtraction was carried out based on non-nuclear pSmad2 stained

501 area of the crypts. EdU+ cells were quantified using CaseViewer. Ileal villus cellular density  
502 (nuclei per  $\mu\text{m}$ ) was quantified using CaseViewer.

503

### 504 **RNA *in situ* hybridization**

505 RNA *in situ* hybridization was performed with RNAScope® 2.5HD Assay-Brown according to  
506 manufacturer's protocol (RNAScope® ACDBio). Probe used: Mouse Asp<sub>n</sub>: Mm-Asp<sub>n</sub> 300031.

507 Samples were counter stained with hematoxylin.

508

### 509 **Cell culture**

510 Colorectal cancer cells HCT-116 were cultured in RPMI-1640 media (Sigma) supplemented with  
511 10% FCS (Gibco), 100 U/ml of Penicillin/Streptomycin (Orion/Sigma) and 2 mM L-glutamine  
512 (Sigma).

513

### 514 **rAsp<sub>n</sub> production and purification**

515 Recombinant mouse Asp<sub>n</sub> (rAsp<sub>n</sub>) was produced in Chinese Hamster Ovary (CHO) cells.

516 Mouse Asp<sub>n</sub> expressing CHO cells were cultured in Alpha MEM (Gibco) medium supplemented  
517 with 10% Dialyzed serum (Sigma), 100 U/ml of Penicillin/Streptomycin (Orion/Sigma), 2 mM L-  
518 glutamine (Sigma), and 75 ug/ml of Zeocin (Sigma). For harvesting rAsp<sub>n</sub> containing media  
519 supernatant, confluent cells (>80%) were cultured without Zeocin for 3 days in alpha MEM  
520 medium supplemented with 2 mM Glutamine, 100 U/ml of Penicillin/Streptomycin (Orion/Sigma)  
521 and 1% FCS (Gibco). Followed by 3 days of culture, media supernatant was collected,  
522 centrifuged, and stored at -80°C. Finally, rAsp<sub>n</sub> was purified from the supernatant using standard  
523 purification procedure. 500 ng/ml rAsp<sub>n</sub> was used in culturing intestinal epithelium.

524

### 525 **Mass spectrometry**

526 Proteomic samples from old iECM are prepared in 6M Urea and analyzed similarly as published  
527 <sup>44</sup> before. MaxQuant (1.6.10.43) database search was used for peptide and corresponding protein  
528 identifications (Data S2).

529

### 530 **Statistical analysis**

531 For analysis of *in vitro* organoid culture, crypt culture on iECM, and histological quantification  
532 investigators were blinded when possible. Microsoft Excel and Graphpad Prism were used for  
533 statistical analysis and visualization of data. All data were analysed by two-tailed Student's t-test.  
534 Paired t-test was applied when appropriate and noted in the figure legends. Statistical significance  
535 of the overlap between two groups of genes for Fig. 3b was calculated using the online tool  
536 ([http://nemates.org/MA/progs/overlap\\_stats.html](http://nemates.org/MA/progs/overlap_stats.html)).

537

### 538 **Human Biopsy samples**

539 Human jejunal samples were obtained from patients undergoing Roux en-Y gastric bypass  
540 surgery. The tissue samples used for organoid functional assay were stored in normal saline on  
541 ice until crypt isolation. The study regarding relevant samples was approved by Helsinki University  
542 Hospital. Written and informed consent was obtained prior to enrolment.

543

### 544 **Animals**

545 *Lgr5-EGFP-IRES-CreERT2*<sup>45</sup>, *Twist2-Cre;Aspn*<sup>fl/fl</sup>, *Twist2-Cre;R26R*<sup>LSL-tdtomato/+</sup> mice were kept in  
546 C57BL/6 background. For *in vivo* proliferation assessment, EdU (20 mg/Kg) in PBS was injected  
547 intraperitoneally 2 hours prior to sacrificing the mice. 5-Fluorouracil (Sigma) was reconstituted in  
548 DMSO (100 mg/ml) and single intraperitoneal injection was given to the mice with a dose of 200  
549 mg/Kg body weight. Young mice with 3-6 months of age were considered young, and used for all  
550 the experiments. Mice with targeted reporter allele for *Aspn* (*Aspn*<sup>Lacz</sup>; C57BL/6N-  
551 *Aspntm1a*(EUCOMM)*Hmgu/leg*) were purchased (INFRAFRONTIER/EMMA), and reporter allele



552 was converted into conditional allele (*Aspn<sup>lox</sup>*) by crossing with mice expressing FLP recombinase  
553 under CAG promoter. Genotyping of the mice were carried out with described primers (Table-2).  
554 Animal housing and all the animal experiments were approved and carried out in accordance with  
555 the regulations of Finnish national animal experimentation board.

556

### 557 **Electron Microscopy**

558 iECM was fixed with 2% Glutaraldehyde in 100 mM Na-Cacodylate (NaCac) buffer (pH 7.4) for  
559 1h at room temperature. Samples were then osmicated with 1% O<sub>s</sub>O<sub>4</sub> in 0.1M NaCac followed by  
560 several washings with 0.1M NaCac and dH<sub>2</sub>O before the samples were dehydrated and dried  
561 overnight. Samples are platinum coated and scanning electron micrographs were obtained using  
562 FEI Quanta 250 Field Emission Gun SEM.

563 **Data and materials availability:** sequencing and tissue mass spectrometry data is publicly  
564 available through ArrayExpress (upon publication).

565 **Acknowledgments:** We thank Professor Marja Mikkola and Professor Ari Ristimäki for their  
566 guidance in thesis committee for S.I., and J. Bärlund and M. Simula for technical supports. Light  
567 Microscopy and Electron Microscopy Units, Meilahti Clinical Proteomics Core Facility, DNA  
568 Sequencing and Genomics Unit of University of Helsinki, and Laboratory Animal Center,  
569 University of Helsinki are thanked for their services.

570 **Funding:** The study was funded by grants from: European Research council (ERC, #677809  
571 P.K.), Academy of Finland (#266869 P.K., #304591 P.K., #314383, 272376 K.H.P.), Knut and  
572 Alice Wallenberg Foundation (KAW 2014.0207), Center for Innovative Medicine (CIMED),  
573 Cancerfonden, Sigrid Juselius Foundation, Finnish Cancer Society, Finnish Medical Foundation,  
574 Novo Nordisk Foundation, Finnish Diabetes Research Foundation. S.I was supported by the

575 Doctoral Programme in Biomedicine of University of Helsinki, Finnish Cultural Foundation,  
576 Biomedicum Helsinki Foundation, Orion Foundation and Ida Montin Foundation.

577 **Author contributions:** S.I. and P.K. designed and interpreted the results of all the experiments.  
578 S.I., E.N., S.A., N.P., A.K., A.W., M.V. performed all the experiments and analysed the results.  
579 D.B. processed and analysed the RNA-sequencing data. E.N. and S.I. analysed the  
580 immunofluorescence images. T.S., A.J. and K.H.P. provided the human biopsy material. A.O.,  
581 K.B.J and M.O. participated in the design and interpretation of experiments. S.I. and P.K. wrote  
582 the paper.

583 **Competing interests:** The authors declare no competing financial interests.

585

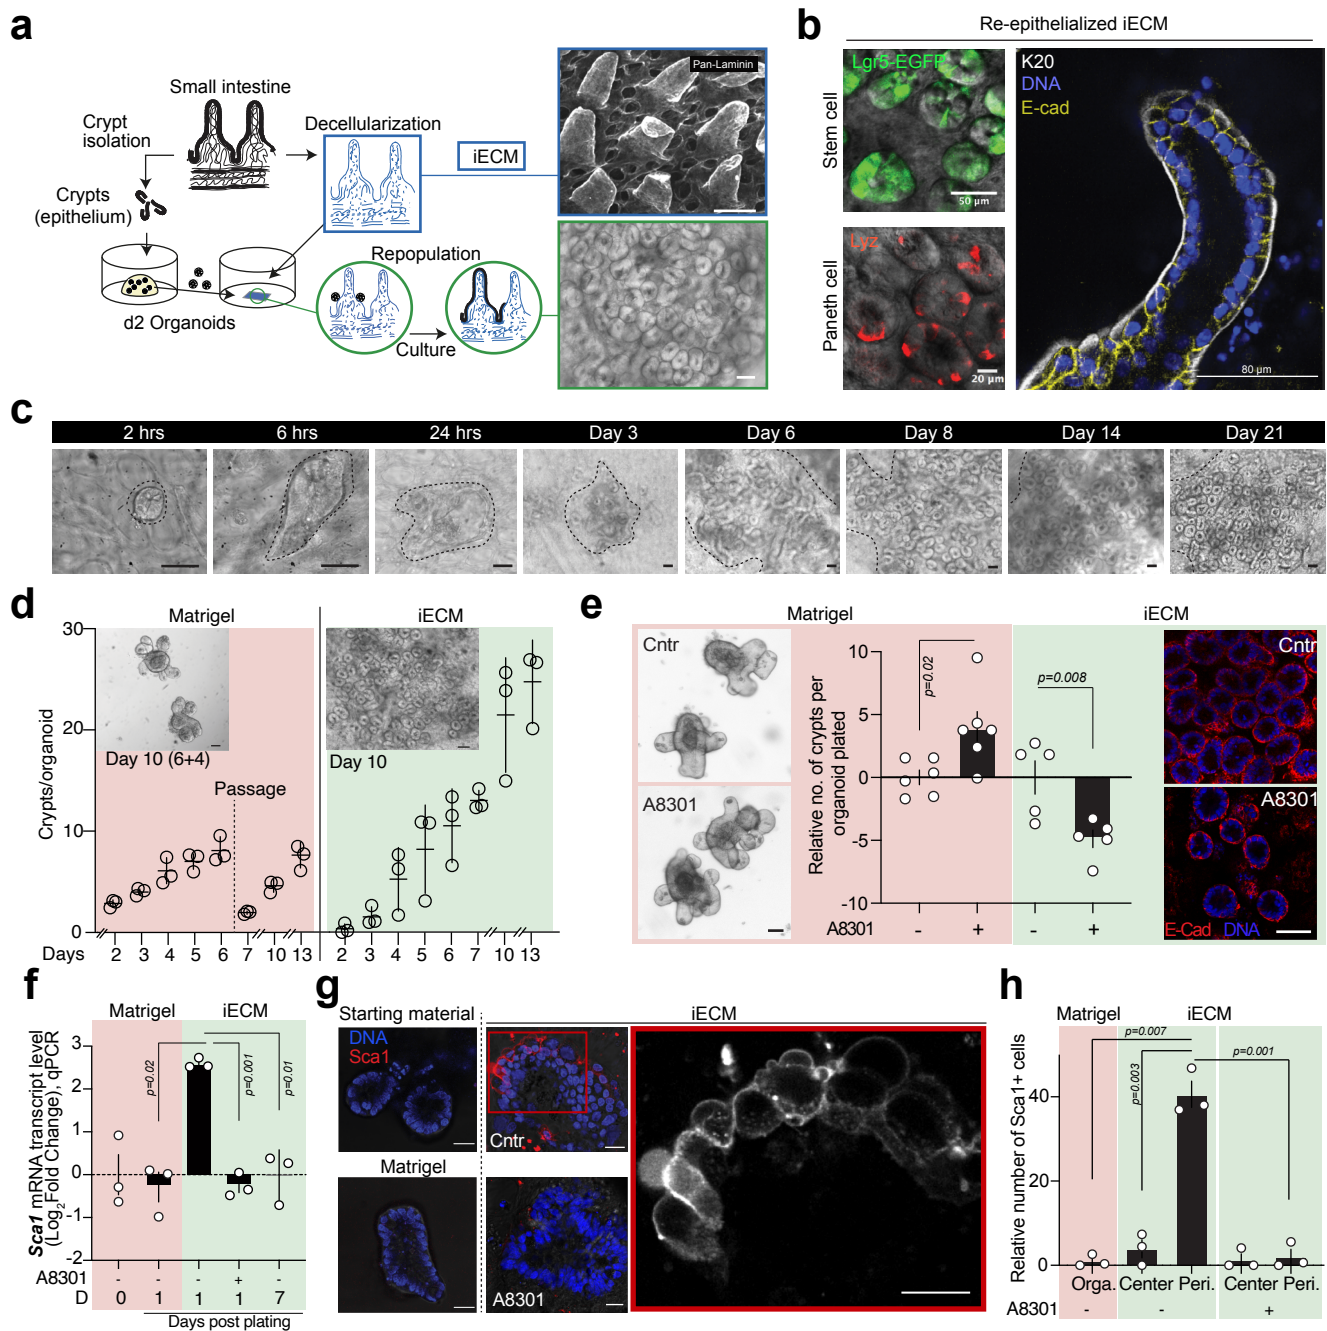

**Figure 1 | Small intestinal epithelium adopts Tgfb-dependent fetal-like pro-regenerative program to regenerate on decellularized ECM (iECM).**

**a**, Generation of decellularized intestinal ECM scaffolds (iECM). Immunofluorescence image of the Pan-Laminin stained iECM. Scale bar 100  $\mu$ m (top; iECM) and 50  $\mu$ m (down; repopulated iECM). **b**, Immunofluorescent detection of differentiated villous epithelium (Keratin20, K20; E-cadherin, E-cad), stem cells (GFP) and Paneth cells (Lysozyme, Lyz) on iECM repopulated with *Lgr5-CreERT2-IRES-EGFP* epithelium for 8 days. **c**, Culture of the intestinal crypts on iECM from the single intestinal organoid on iECM at different timepoints. Scale bar 50  $\mu$ m. **d**, Comparison of the growth dynamics of intestinal epithelium in organoid culture and on iECM. Organoid culture (red); iECM (green).  $n=3$  mice. mean  $\pm$  s.d. Scale bar 50  $\mu$ m. **e**, Impact of the inhibition of Tgfb receptor Type I (TgfbRI) on the regenerative capacity of the intestinal epithelium in matrigel and on iECM. Representative micrographs show the growth of new crypts from single spherical organoid in five (matrigel; left) and seven (iECM; right) days. E-cad (red); DNA (blue). A8301 = TgfbRI inhibitor. Student's paired t-test, mean  $\pm$  s.d. Scale bar 50  $\mu$ m. **f**, qPCR analysis of the relative mRNA level of *Sca1* from the intestinal organoids (D0: before passaging; D1: 24 hrs after passaging in matrigel) and intestinal epithelium on iECM (D1 & D7: Day 1 & Day 7 post-plating on iECM from matrigel). *Rpl13a* was used as a reference gene. Values show fold change in comparison to Day 0 intestinal organoids. Student's paired t-test, mean  $\pm$  s.e.m. **g**, Representative immunofluorescent images of the intestinal organoids, and intestinal epithelium (Day 1 and Day 7 post-plating) on iECM. Scale bar 20  $\mu$ m. **h**, Relative number of *Sca1*<sup>+</sup> cells in the matrigel-cultured intestinal organoids, and in the intestinal epithelium plated on iECM (day 1 post-plating). Values were normalized with the number of *Sca1*<sup>+</sup> cells in the intestinal organoids. Student's paired t-test, mean  $\pm$  s.e.m. Peri. = Peripheral epithelial cells on iECM.  $n=3$  mice.

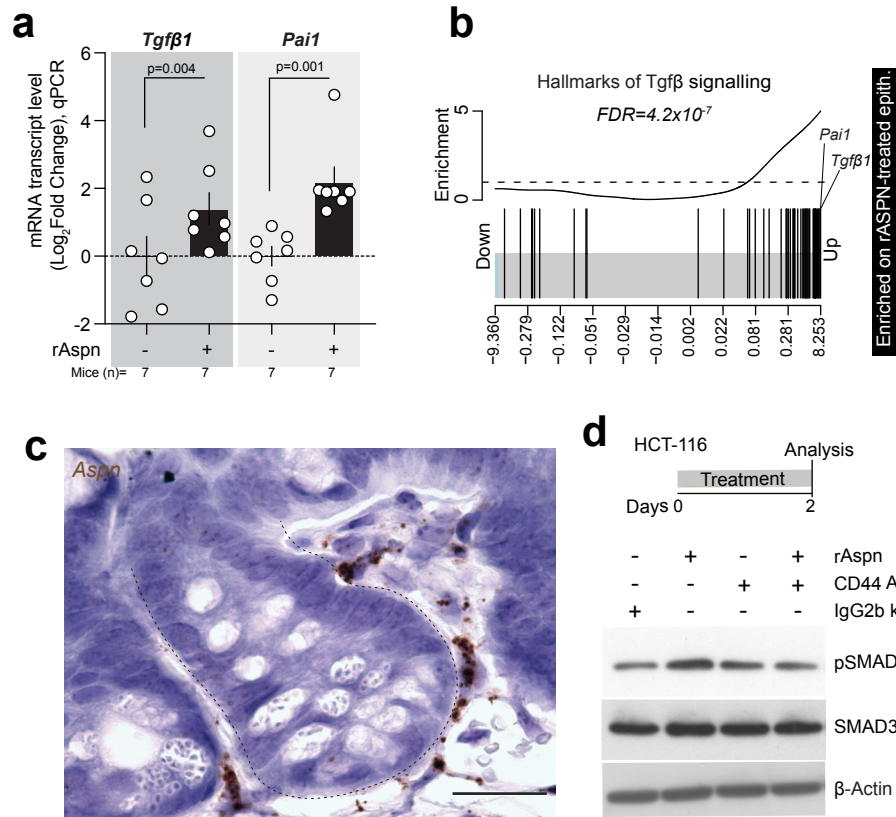

**Figure 2 | Mesenchymal Aspn promotes Tgfβ signaling via CD44 receptor.**

**a**, qPCR analysis of *Tgfβ1* and *Pai1* expression in the rAspn-treated (48 hrs) intestinal organoids. Values show fold change in comparison to control. *Rpl13a* was used as a reference gene. Student's paired *t*-test, mean  $\pm$  s.e.m. **b**, GSEA analysis for the gene list "Hallmarks of Tgfβ signalling" on transcription profiles from rAspn (500ng/ml) treated (48 hrs) organoids. False discovery rate (FDR) of enrichment is shown. **c**, *In situ* analysis of *Aspn* expression in the pericryptal area. Brown (*Aspn*). Scale bar 20  $\mu$ m. **d**, Immunoblot for pSMAD3, SMAD3 and  $\beta$ -ACTIN on rAspn and/or CD44 Ab-treated (48 hrs) HCT-116 cells.

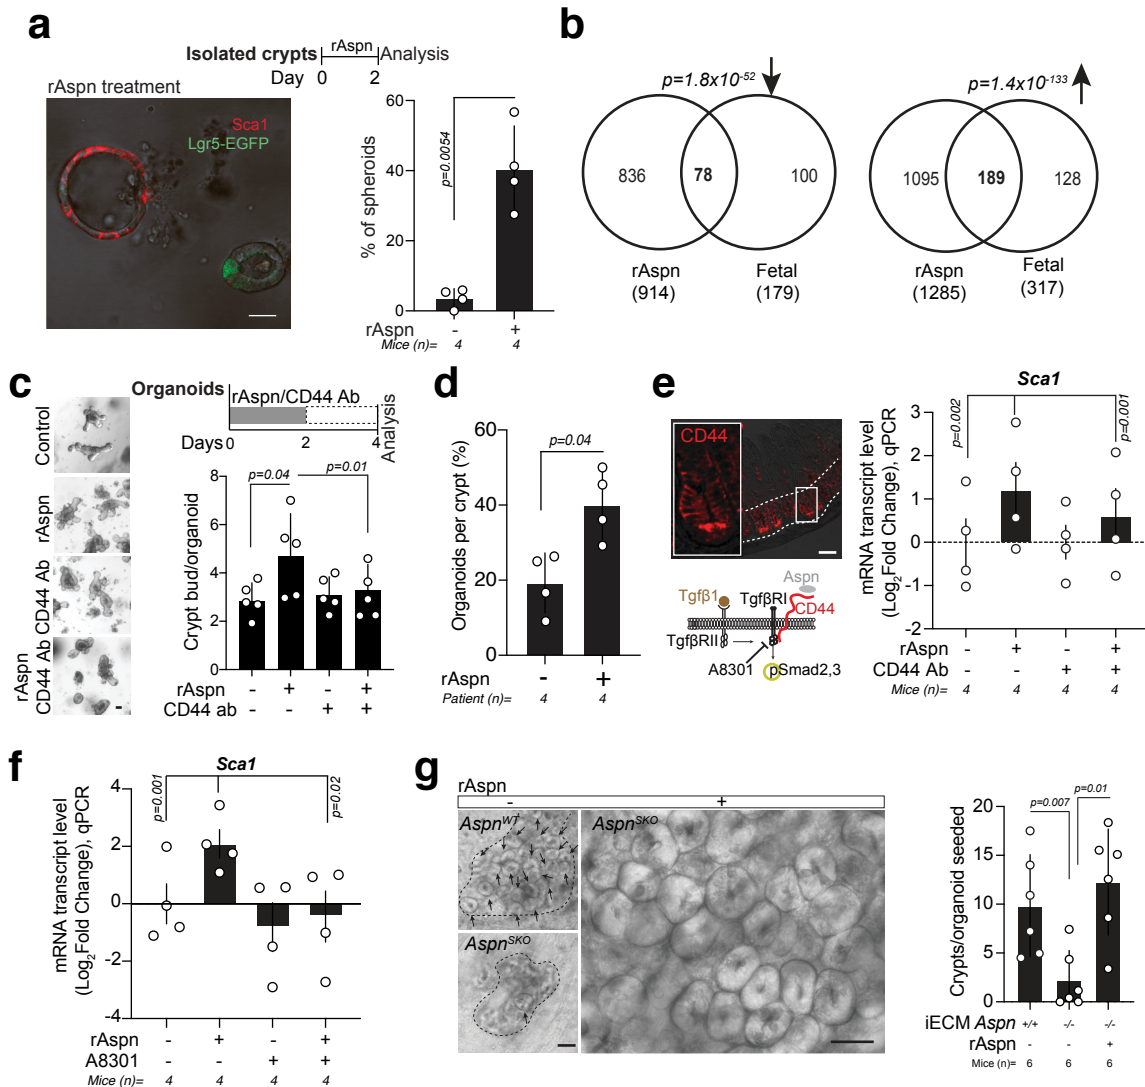

**Figure 3 | rAspn promotes intestinal epithelial regeneration by inducing fetal-like transcriptional state via Tgfβ signalling.**

**a**, Analysis of spheroidicity of rAspn-treated organoids (n=4). Crypts were isolated from *Lgr5- CreERT2-IRES-EGFP* reporter mice. Mean +/- s.d. Student's paired t-test. Lgr5+ (Green) stem cells and Sca1 (Red) staining are shown in the rAspn-treated organoids (left). Scale bar 30  $\mu$ m. **b**, Venn diagram of genes with altered expression in mouse fetal organoids and in adult organoids after rAspn treatment. P-values show significance of overlap. Upregulated (Upward arrow), downregulated (Downward arrow). **c**, Regenerative growth of crypts (n=5 mice) treated transiently with rAspn, and/or CD44 function-blocking antibody/IgG2b kappa control antibody. Mean +/- s.d. Student's paired t-test. Scale bar 50  $\mu$ m. **d**, Organoid forming capacity of rAspn treated isolated human small intestinal crypts (n=4 human subjects). Mean +/- s.d. Student's paired t-test. **e-f**, qPCR analysis of the relative mRNA level of *Sca1* in the rAspn treated mouse intestinal organoids (n=4 mice). CD44 function-blocking antibody or isotype control IgG2b kappa (in **e**), and Tgfβ Type I receptor inhibitor (A8301) (in **f**), were used to probe dependency on CD44 and TgfβRI. Sites of intervention and CD44 staining in the intestinal epithelium are shown in **e**. Values show the fold change in comparison to untreated control organoids. *Rpl13a* was used as a reference gene. Mean +/- s.e.m. Student's paired t-test. **g**, Regenerative growth of the wild type epithelium on *Aspn*<sup>WT</sup> and *Aspn*<sup>SKO</sup> iECM with or without rAspn (500 ng/ml; 2 days treatment). Mean +/- s.d. Student's paired t-test. Scale bar 50  $\mu$ m.



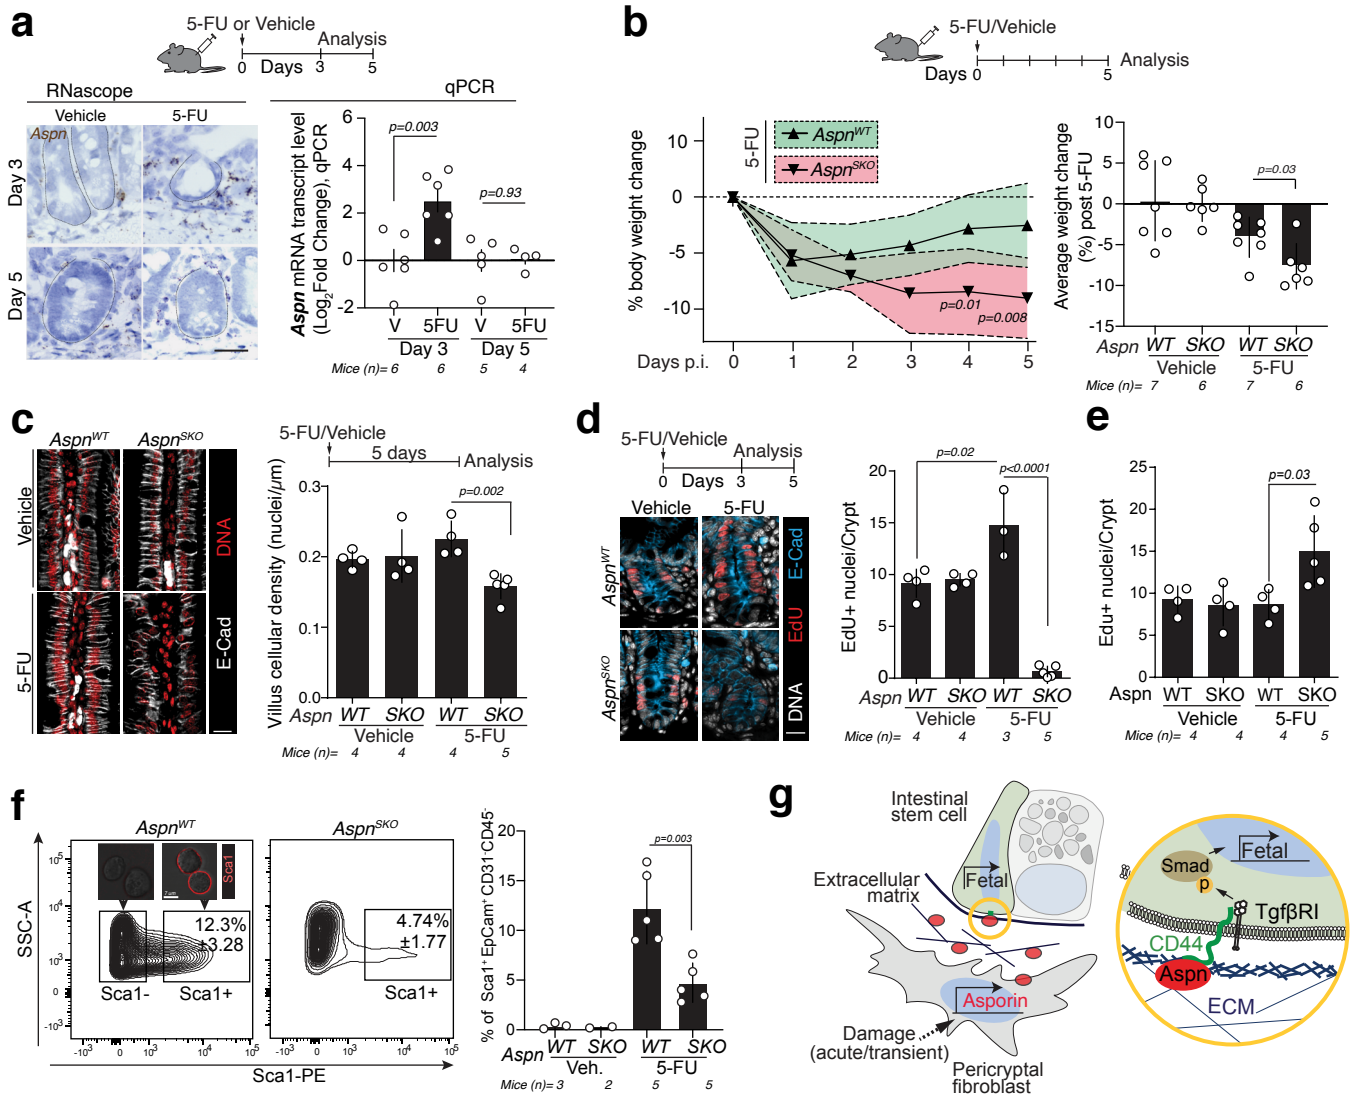

**Figure 4 | Mesenchymal loss of *Aspn* impedes induction of epithelial fetal-like state and repair after damage.**

**a**, Analysis of *Aspn* expression in the mouse intestine three and five days after 5-Fluorouracil injection (5-FU, 200 mg/kg). *In situ* hybridization (left) and qPCR (right). qPCR values show the fold change relative to Vehicle (V; DMSO)-treated mice. *Actin* as a reference gene in qPCR. Scale bar 20  $\mu$ m. Student's unpaired *t*-test. **b**, Relative body weight loss of *Aspn*<sup>WT</sup> and *Aspn*<sup>SKO</sup> mice ( $n=6-7$  mice per group) treated with vehicle (DMSO) or 5-FU. Daily data points represent median and interquartile range (dashed line). Average weight loss post 5-FU (days 1-5) is shown for all groups (bar graph, right). Student's unpaired *t*-test. **c**, Cellular density of the ileal villi in *Aspn*<sup>WT</sup> and *Aspn*<sup>SKO</sup> mice after vehicle or 5-FU ( $n=4-5$  mice/group). Scale bar 20  $\mu$ m. **d-e**, Quantification of EdU+ proliferative epithelial cells in *Aspn*<sup>WT</sup> and *Aspn*<sup>SKO</sup> mice three (**d**) and five (**e**) after vehicle/5-FU injections ( $n=3-5$  mice per group analysed). Scale bar 20  $\mu$ m. Mean  $\pm$  s.d. Student's unpaired *t*-test. **f**, Flow cytometry analysis of small intestinal Sca1<sup>+</sup>EpCam<sup>+</sup>CD31<sup>-</sup>CD45<sup>-</sup> cells isolated from vehicle and 5-FU treated *Aspn*<sup>WT</sup> and *Aspn*<sup>SKO</sup> mice ( $n=2-5$ ; Day 3 post injection). FACS-sorted Sca1<sup>+</sup>EpCam<sup>+</sup>CD31<sup>-</sup>CD45<sup>-</sup> (inset; left) Sca1<sup>+</sup>EpCam<sup>+</sup>CD31<sup>-</sup>CD45<sup>-</sup> (inset; right), and average frequency ( $\pm$  s.d.) of Sca1<sup>+</sup>EpCam<sup>+</sup>CD31<sup>-</sup>CD45<sup>-</sup> cells is shown ( $n=2-5$  mice). Bar graph shows the frequency of Sca1<sup>+</sup>EpCam<sup>+</sup>CD31<sup>-</sup>CD45<sup>-</sup> cells ( $n=2-5$ ). Mean  $\pm$  s.d. Student's unpaired *t*-test. **g**, Schematic model on the role of *Aspn* in intestinal regeneration.

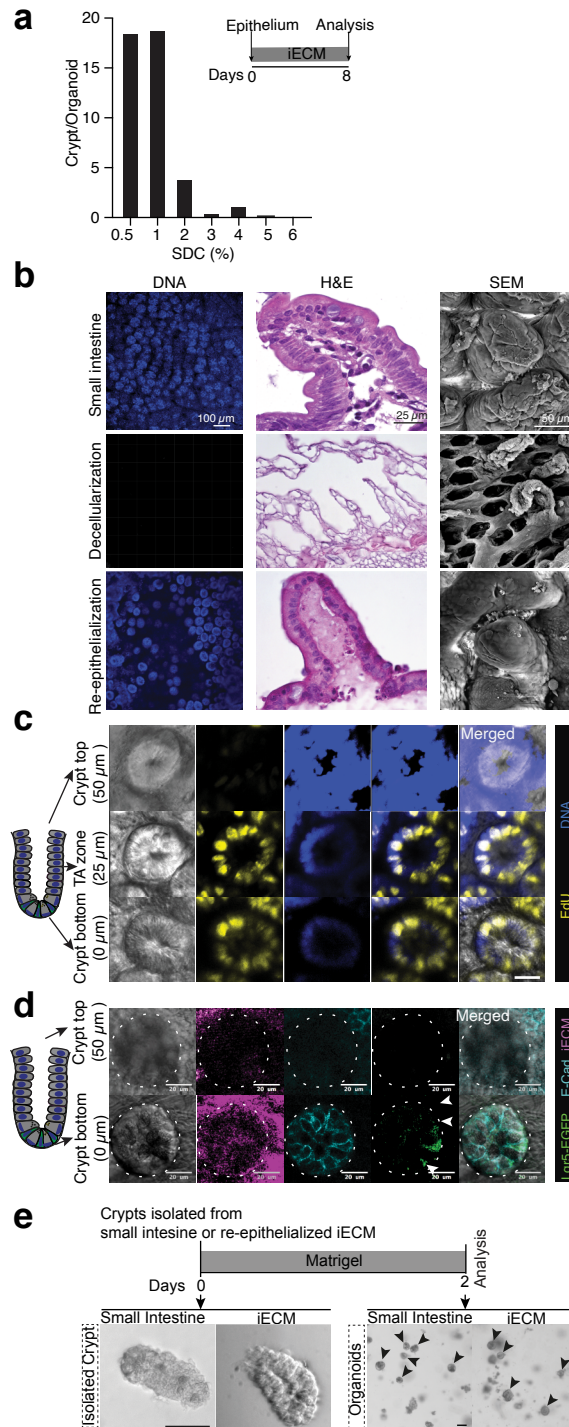

### Extended Data Figure 1 | Organotypic growth of intestinal epithelium on iECM.

**a**, Optimization of the amount of sodium deoxycholate (SDC) for iECM generation. Different amount of SDC (0.5-6%) was used for the tissue decellularization. Number of crypts/organoid was quantified 8 days after seeding epithelium on iECM. **b**, Decellularization of mouse small intestine preserves the ECM contour of crypts and villi. Repopulation of crypts and villi guided by the iECM. DNA: Hoechst stain, H&E: Haematoxylin+Eosin stain of cryosections, SEM: scanning electron micrograph. **c**, Proliferation on iECM is restricted to the repopulated crypt pits. Representative images of Edu+ proliferative cells at the crypt base. Confocal fluorescence microscopy. Blue (DNA, Hoechst), Yellow (EdU). Scale bar 20  $\mu$ m. **d**, Lgr5-EGFP cells are restricted to the crypt base on iECM. Representative fluorescent images of iECM repopulated with epithelium from *Lgr5-CreERT2-IRES-EGFP* mouse. Pink (iECM, autofluorescence of collagen), Cyan (E-Cad), Green (EGFP labeled Lgr5 expressing stem cells). Scale bar 20  $\mu$ m. All the images were obtained after 7 days of culture on iECM. **e**, Comparison of morphologies of the freshly isolated crypts (left) and matrigel-cultured organoids (right; 2 days in culture), obtained from small intestine and re-epithelialized iECM (7 days culture). Scale bar 50  $\mu$ m.

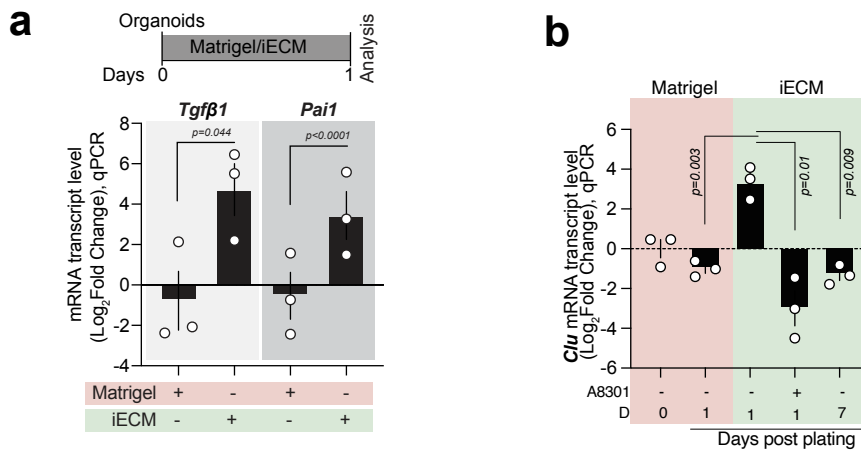

**Extended Data Figure 2 | Comparison of the induction of the *Tgfβ* pathway-responsive genes, and marker of revival stem cells, in matrigel and iECM.**

**a**, qPCR analysis of *Tgfβ1* and *Pai1* expression in the intestinal epithelium after 24 hours culture in matrigel and on iECM. Values show fold change in comparison to matrigel-cultured organoids. *Rpl13a* was used as a reference gene. Student's paired *t*-test, mean +/- s.e.m. **b**, qPCR analysis of the relative mRNA level of *Sca1* from the intestinal organoids (D0: before passaging; D1: 24 hrs after passaging in matrigel) and intestinal epithelium on iECM (D1 & D7: Day 1 & Day 7 post-plating on iECM from matrigel). *Rpl13a* was used as a reference gene. Values show fold change in comparison to Day 0 intestinal organoids. Student's paired *t*-test, mean +/- s.e.m.

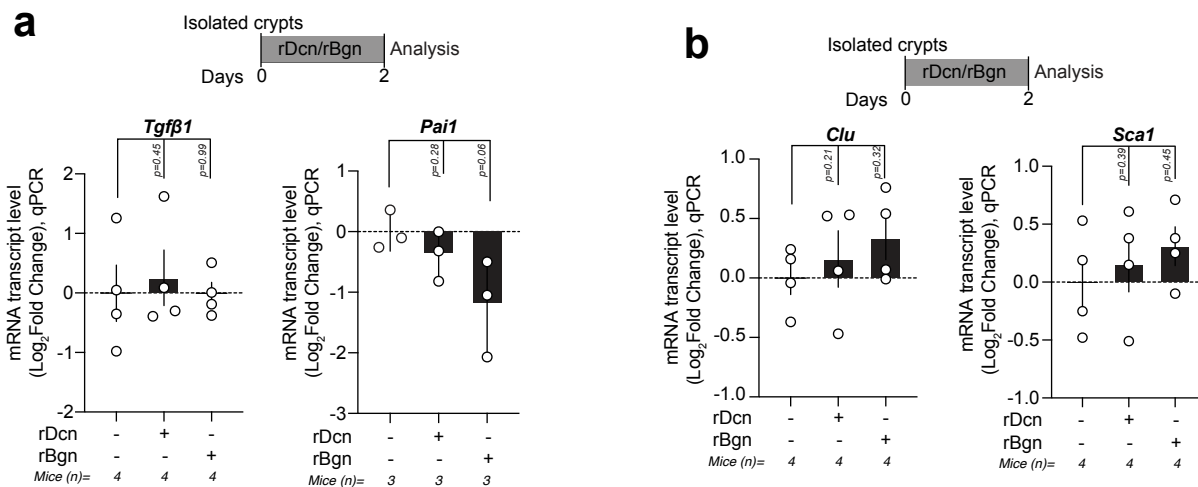

**Extended Data Figure 3 | Effects of the recombinant Decorin (rDcn) and Biglycan (rBgn) in the expression of the marker genes of the *Tgfβ* pathway and fetal state in the intestinal organoids.**

**(a-b)** qPCR analysis of *Tgfβ1* and *Pai1* expression (in **a**) – and *Clu* and *Sca1* expression (in **b**) in the rDcn and rBgn-treated (48 hrs) intestinal organoids. Values show fold change in comparison to untreated control organoids. *Rpl13a* was used as a reference gene. Student's paired *t*-test, mean +/- s.e.m.



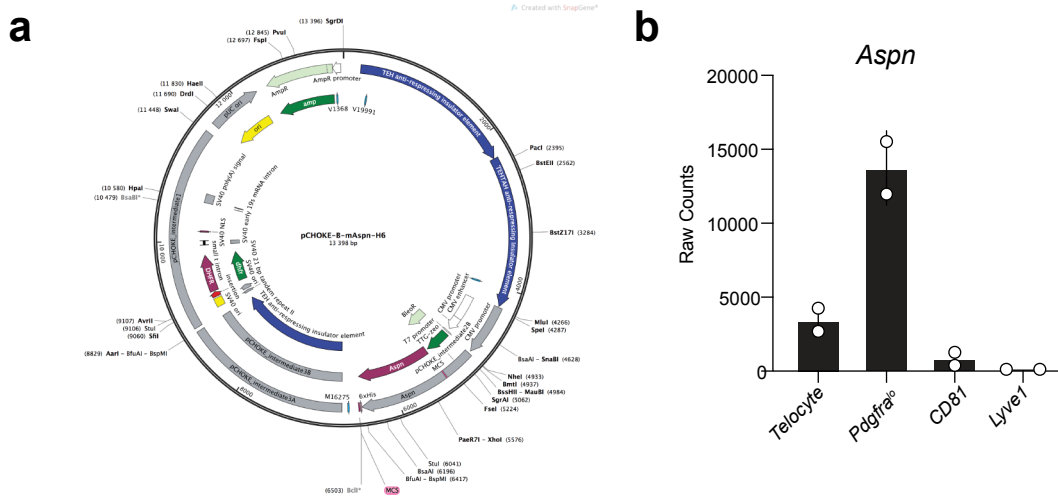

**Extended Data Figure 4 | Production of recombinant *Aspn* (rAspn), and *Aspn* expression in the intestinal mesenchyme.**

**a**, Construct used to produce recombinant *Aspn* (rAspn) in CHO cells. **b**, Expression of *Aspn* in the different mesenchymal cell types of mouse small intestine. Data was obtained from the previously published publically available database (GEO accession number: GSE130681).

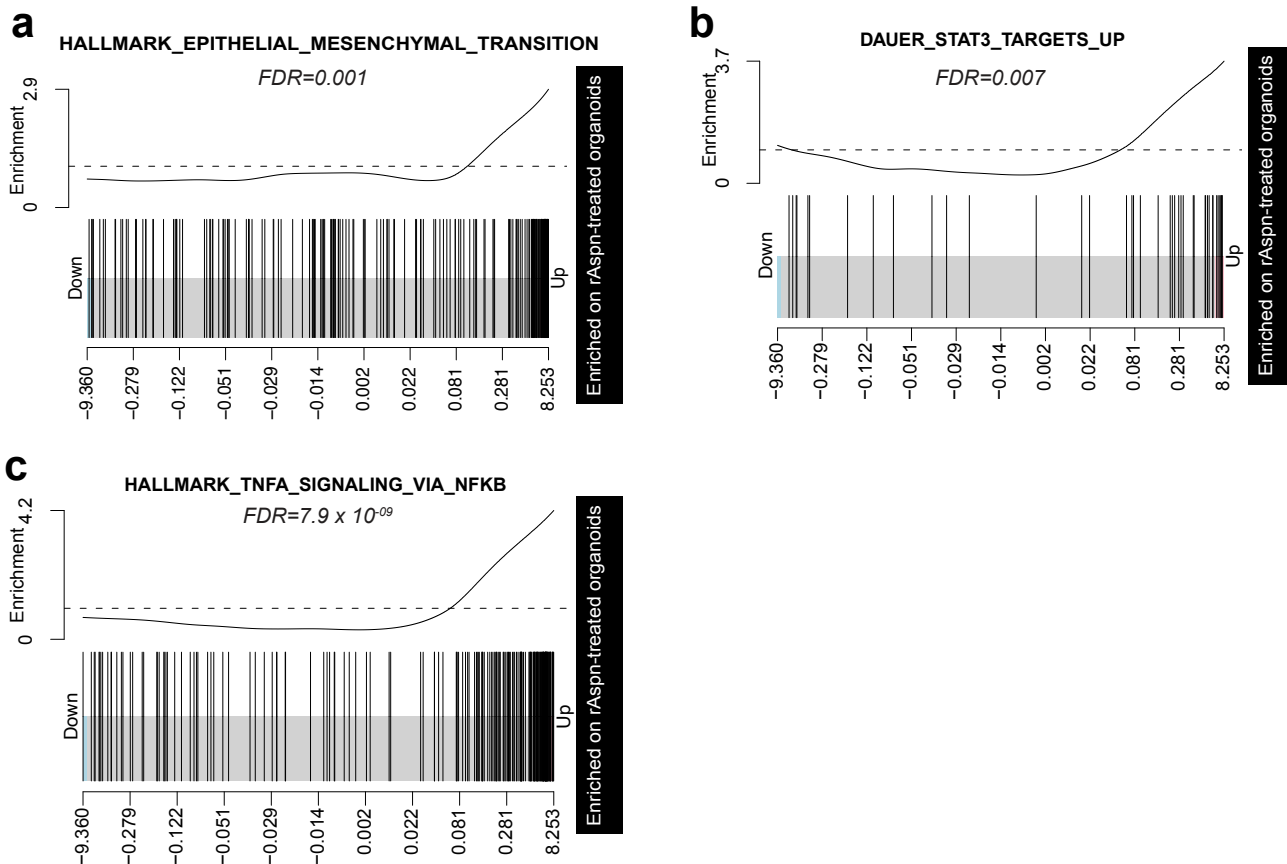

**Extended Data Figure 5 | Enrichment of CD44 downstream signalling pathways in rAspn-treated organoids**

**a-c**, GSEA analysis of the gene list “Hallmark\_Epithelial\_Mesenchymal\_Transition (**a**), Dauer\_Stat3\_Targets\_Up (**b**) and Hallmark\_Tnfa\_Signalling\_via\_Nfkb (**c**)” in the intestinal organoids treated with rAspn (500 ng/ml; 48 hours). False discovery rate (FDR) is shown.

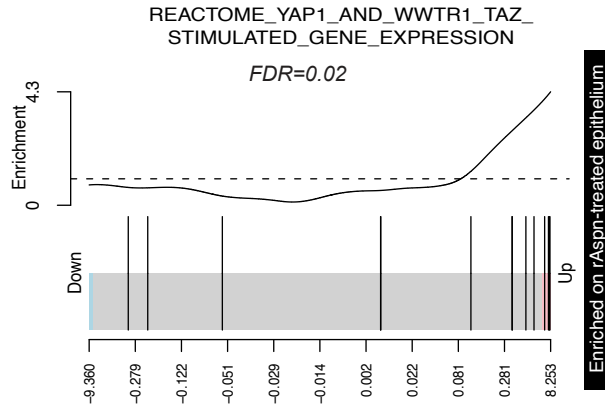

### Extended Data Figure 6 | Yap1/Taz pathway-related gene expression in the rAspn-treated intestinal organoids.

GSEA analysis of the gene list “REACTOME\_YAP1\_AND\_WWTR1\_TAZ\_STIMULATED\_GENE EXPRESSION” in the intestinal organoids treated with rAspn. False discovery rate (FDR) is shown.

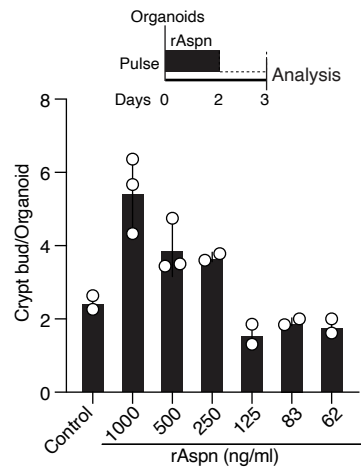

### Extended Data Figure 7 | Titration of the doses of rAspn for treating intestinal organoids.

Titration of rAspn concentrations for effects on intestinal organoids (n=2-3 mice). Untreated samples were used as control. Mean +/- s.d.

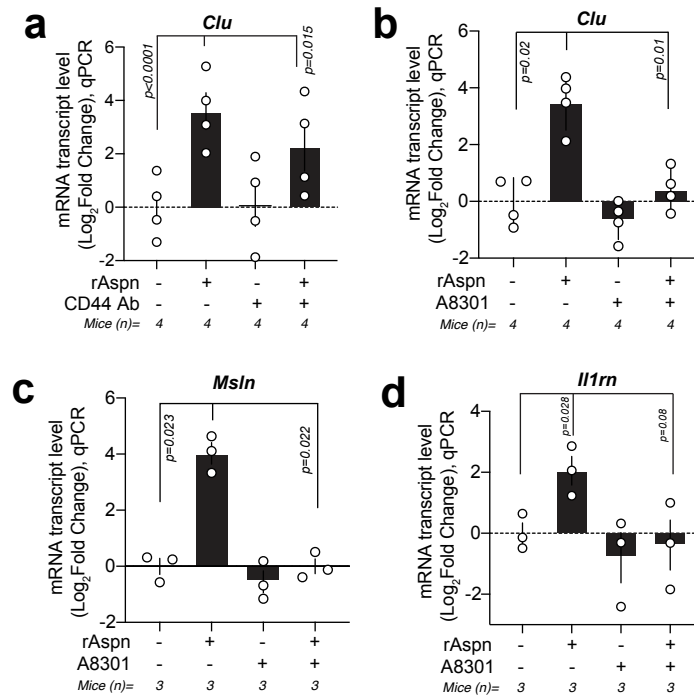

### Extended Data Figure 8 | rAspn induces fetal-like transcription TgfbRI dependently.

**a**, qPCR analysis of *Clusterin* (*Clu*) in rAspn and/or CD44 function-blocking antibody treated small intestinal organoids (n=4). Isotype control IgG2b kappa was used in samples not receiving CD44 Ab. Values show fold change in comparison to untreated control organoids. *Rpl13a* was used as a reference gene. Mean +/- s.e.m. Student's paired *t*-test. **b-d**, qPCR analysis of the relative mRNA level of *Clu*, *Il1rn*, and *Msln*, in the rAspn and/or TgfbType I receptor inhibitor (A8301)-treated mouse intestinal organoids (n=4 mice for *Clu*, n=3 mice for *Msln*, and *Il1rn*). Values show fold change in comparison to untreated control organoids. *Rpl13a* was used as a reference gene. Mean +/- s.e.m. Student's paired *t*-test.

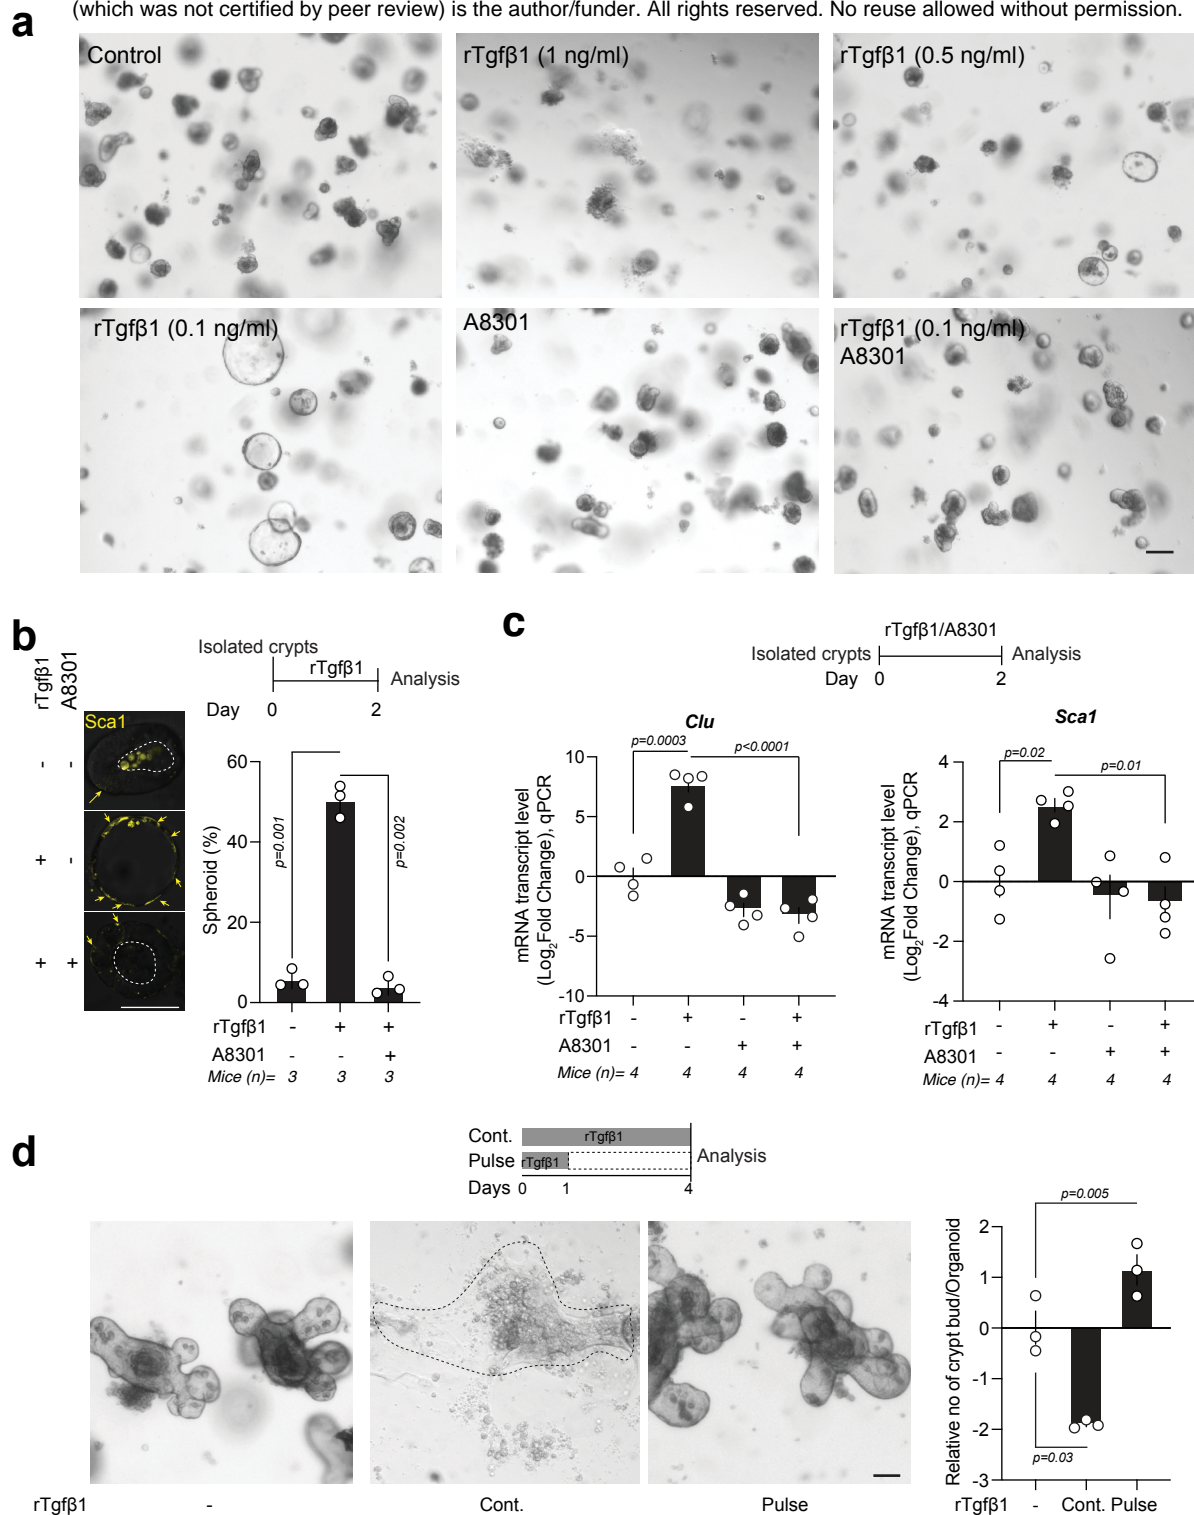

### Extended Data Figure 9 | rTgfβ1 induces fetal-like state in the intestinal organoids.

**a**, Representative micrographs of the intestinal organoids with different concentrations of the rTgfβ1 with/without Tgfβ type I receptor inhibitor A8301 (500 nM). Isolated crypts were cultured under the indicated conditions in the micrographs for 2 days. Scale bar 50 μm. **b**, Analysis of spheroid forming capacity of rTgfβ1 (0.1 ng/ml) and/or A8301 (500 nM) treated mouse intestinal organoids (left; n=3). Mean +/- s.d. Student's paired *t*-test. Scale bar 20 μm. **c**, qPCR analysis of *Clu* and *Sca1* from rTgfβ1 (0.1 ng/ml) and/or A8301 (500 nM) -treated intestinal organoids (n=4). Values show fold change in comparison to untreated control organoids. *Rpl13a* was used as a reference gene. Mean +/- s.e.m. **d**, Regenerative growth of crypts (n=3 mice) with transient (1 day) and sustained (5 days) treatment of rTgfβ1 (0.1 ng/ml). Values in the bar graph were normalized with the untreated control samples. Mean +/- s.e.m. Scale bar 50 μm. Student's paired *t*-test.

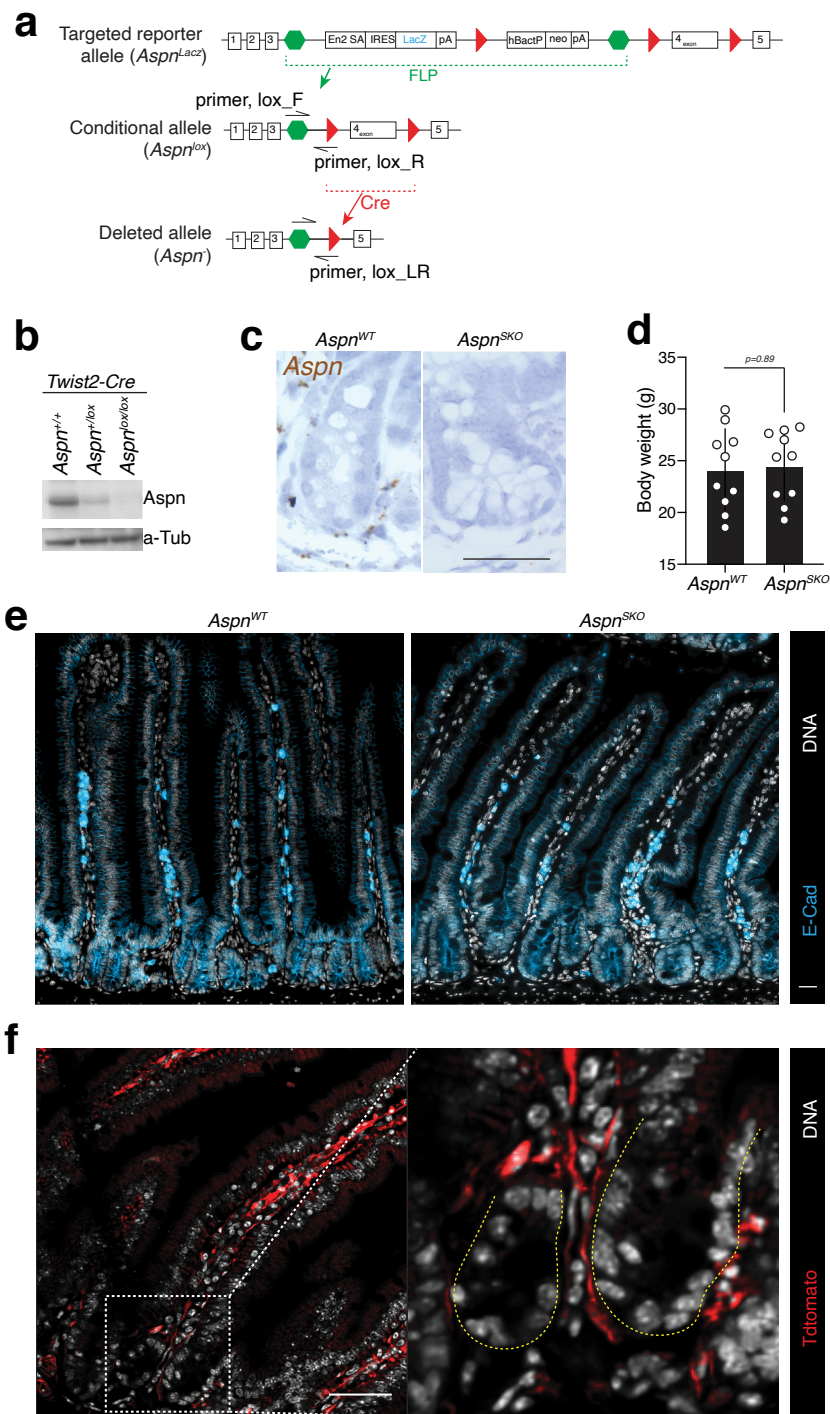

**Extended Data Figure 10 | Generation of a mouse model with conditional *Aspn* allele, and tissue specific deletion of mesenchymal *Aspn*.**

**a**, Targeting and development of *Aspn* alleles. **b**, Immunoblot of *Aspn* and alpha-Tubulin of the ileal tissue samples from the *Twist2-Cre; Aspn<sup>+/+</sup>* (*Aspn<sup>WT</sup>*), *Twist2-Cre; Aspn<sup>+/lox</sup>* & *Twist2-Cre; Aspn<sup>lox/lox</sup>* (*Aspn<sup>SKO</sup>*) mice. **c**, *In situ* analysis of *Aspn* expression in *Aspn<sup>WT</sup>* and *Aspn<sup>SKO</sup>* mice. Scale bar 50  $\mu$ m. **d**, Body weight analysis of the young (2-6 mo) *Aspn<sup>WT</sup>* and *Aspn<sup>SKO</sup>* littermates (n=10 pairs mice). Loss of mesenchymal *Aspn* has no adverse effects on growth. Mean  $\pm$  s.d. Student's unpaired *t*-test. **e**, Comparison of the small intestinal morphology from *Aspn<sup>WT</sup>* and *Aspn<sup>SKO</sup>* mice. White (DNA), cyan (E-Cad). Scale bar 50  $\mu$ m. **f**, Lineage tracing in the *Twist2-Cre; R26R<sup>LSL</sup>-tdtomato<sup>+/+</sup>* mice. Red cells show the Cre-mediated recombined cells. Yellow dotted lines mark the crypt epithelium. White (DNA), Red (Tdtomato). Scale bar 50  $\mu$ m.



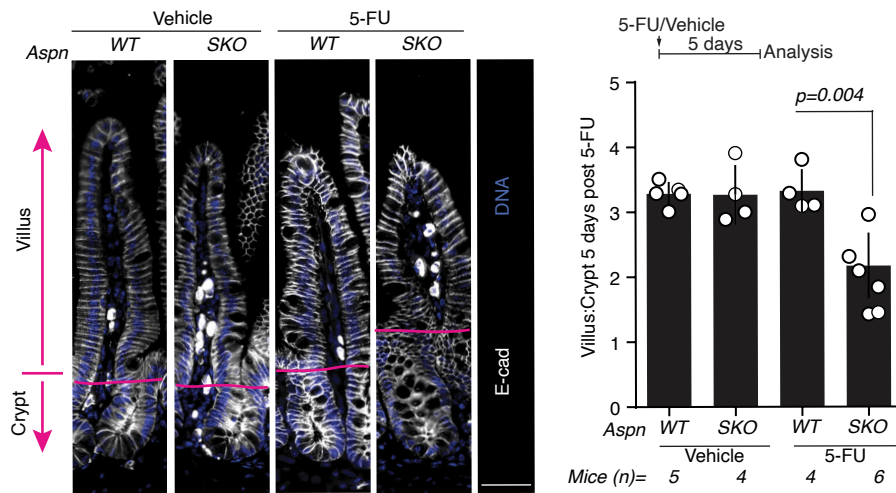

### Extended Data Figure 11 | Conditional knock out of *Aspn* impedes intestinal regeneration.

Analysis of crypt and villus lengths in the histological sections of *Aspn*<sup>WT</sup> and *Aspn*<sup>SKO</sup> mice five days after treatment with 5-FU (200 mg/kg body weight) or vehicle only (DMSO). White (E-Cad), Blue (DNA). Mean±s.d. Scale bar 50 μm. Student's unpaired *t*-test.

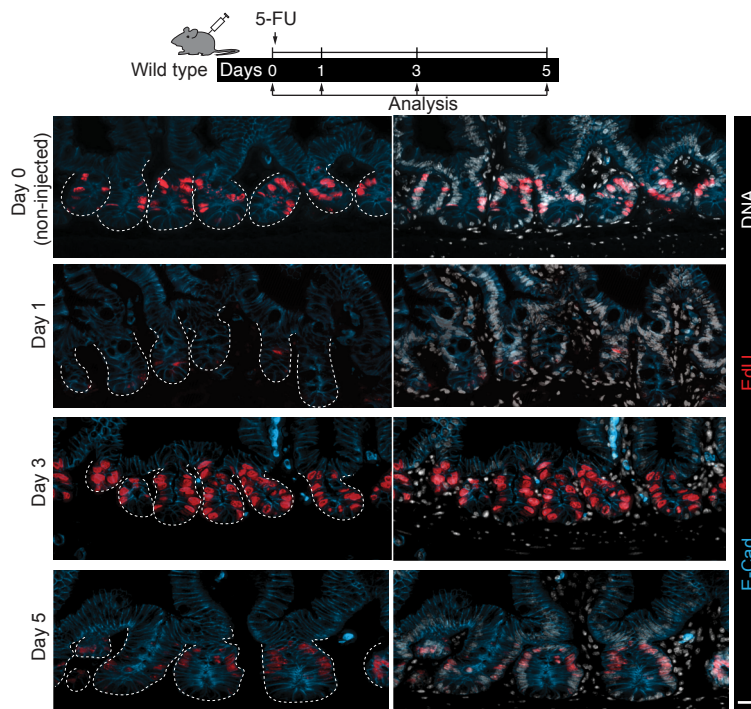

### Extended Data Figure 12 | Temporal dynamics of the proliferative cells in the 5-FU induced regenerating intestine.

Comparison of the intestinal epithelial proliferation upon 5-FU injection (200 mg/Kg body weight) at different time points - Day 0 (non-injected), Day 1, Day 3 and Day 5 post injections in wild type mice. White (DNA), Red (EdU), Cyan (E-Cad). Scale bar 20 μm.

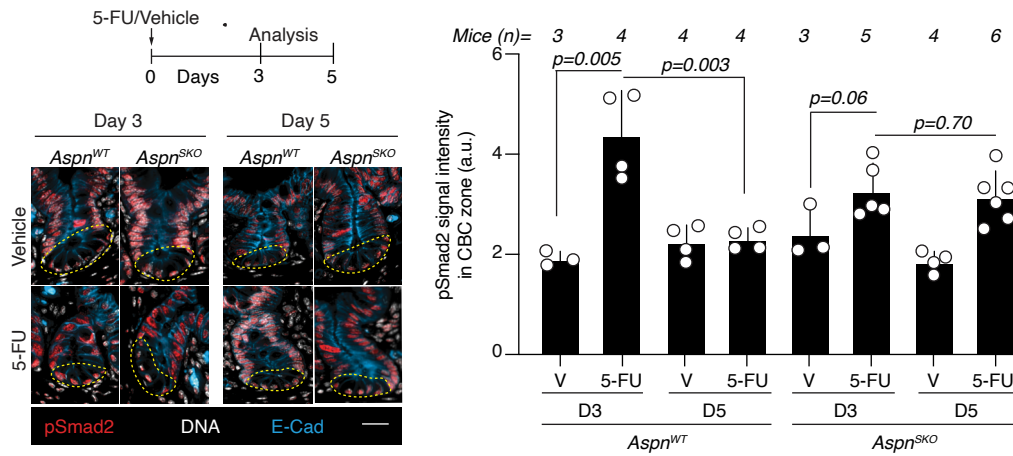

### Extended Data Figure 13 | Induction dynamic of epithelial Tgfb signaling is altered in mice with mesenchymal deletion of Aspn

pSmad2 staining (Red) of the crypt base cells three (D3) and five (D5) days after Vehicle (V) or 5-FU (200 mg/kg body weight) injection in *Aspn<sup>WT</sup>* and *Aspn<sup>SKO</sup>* mice. (n=3-6 mice per group). White (E-Cad), Blue (DNA). Mean $\pm$ s.d. Scale bar 50  $\mu$ m. Student's unpaired t-test.

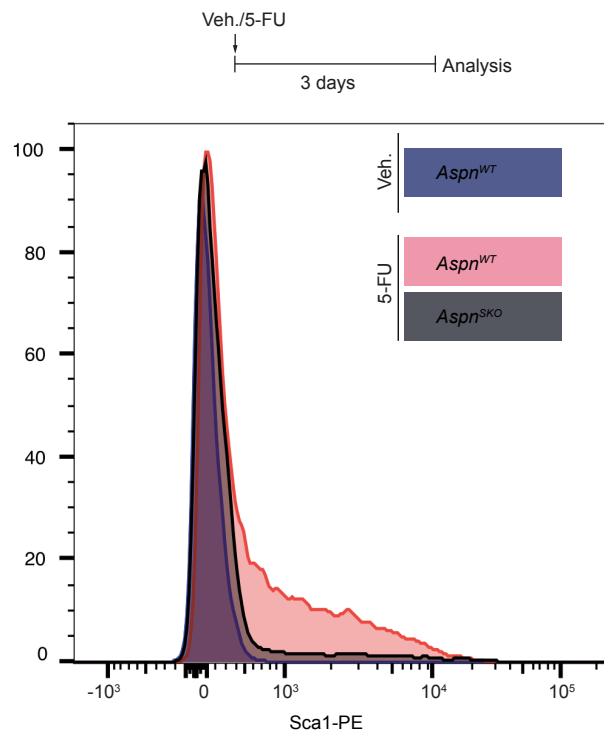

### Extended Data Figure 14. Damage-induced increase in Sca1<sup>+</sup> cells is diminished in *Aspn<sup>SKO</sup>* mice.

Flow cytometric analysis of small intestinal Sca1<sup>+</sup> EpCam<sup>+</sup> CD31<sup>-</sup> CD45<sup>-</sup> cells isolated from vehicle and 5-FU treated *Aspn<sup>WT</sup>* and *Aspn<sup>SKO</sup>* mice (n=2-5; Day 3 post injection). Histogram shows distribution of Sca1 intensity in representative examples.
